# Supplementary material for: Synthesis and13C-NMR analysis of an ethylene copolymer with 9-decen-1-ol
Source: Royal Society of Chemistry journal article supplement (doi:10.1039/c5ra20007e), 2015-01-01

*Supporting Information*

**Synthesis and  $^{13}\text{C}$ -NMR Analysis of Ethylene Copolymer with 9-Decen-1-ol**

*Liping Hou, Wei Wang\*, Jianfang Sheng, Changcheng Liu*

---

Dr. L. Hou, Dr. W. Wang, Ms. J. Sheng, Mr. C. Liu  
Institute of Materials Science, Beijing Research Institute of Chemical Industry  
(BRICI), Sinopec, No. 14 Beisanhuan Donglu, Chao Yang District, Beijing (100013),  
China  
E-mail: wangw.bjhy@sinopec.com

1. GPC curves for all polymer samples
2.  $^{13}\text{C}$ -NMR spectra for all polymer samples

1. GPC curves

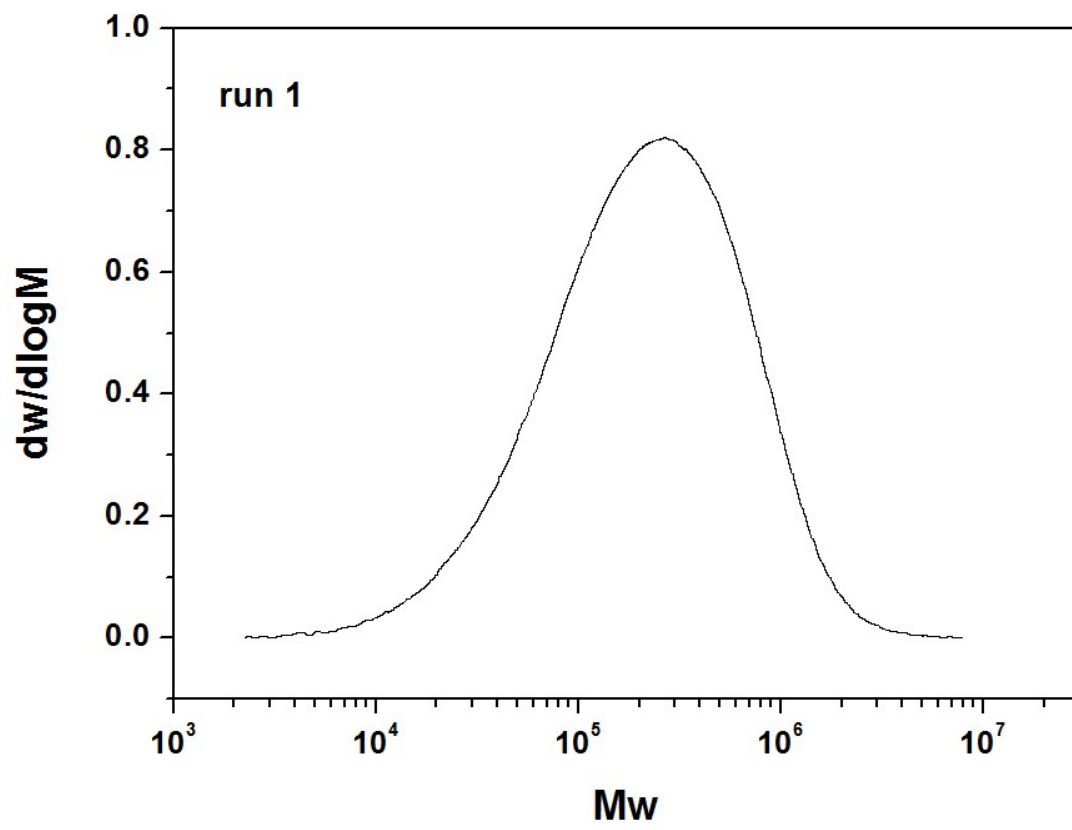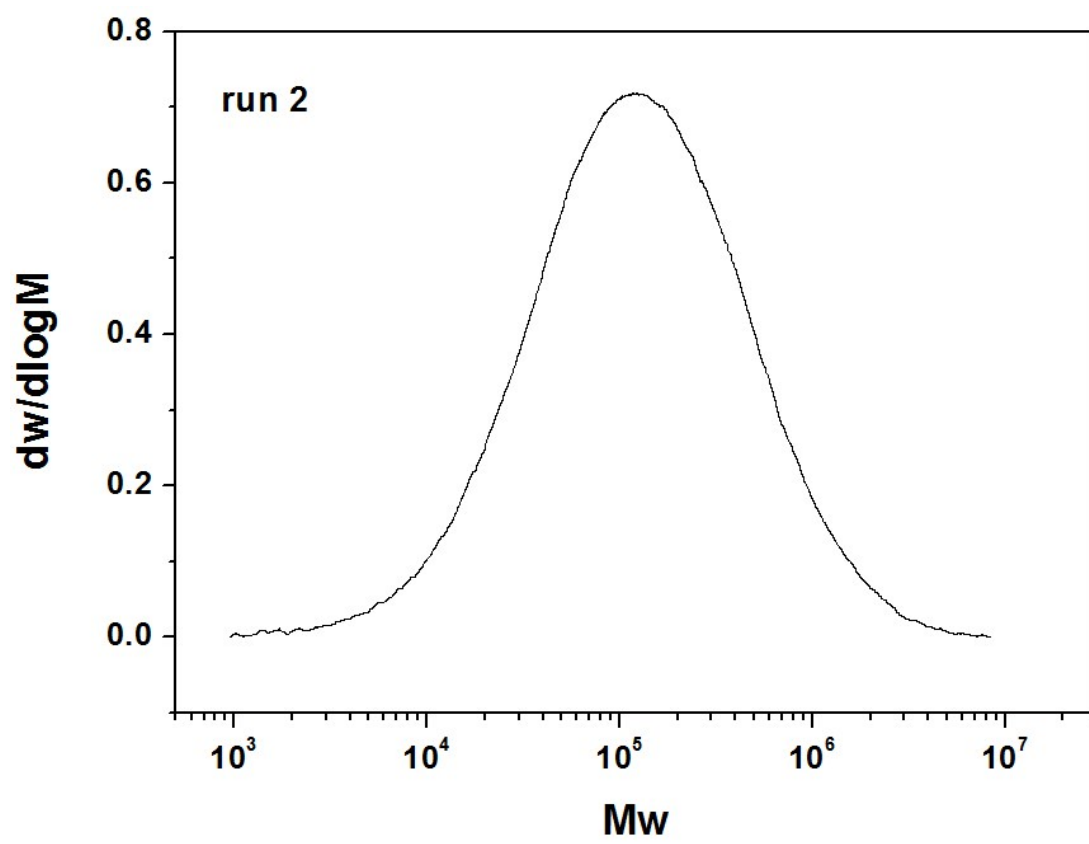

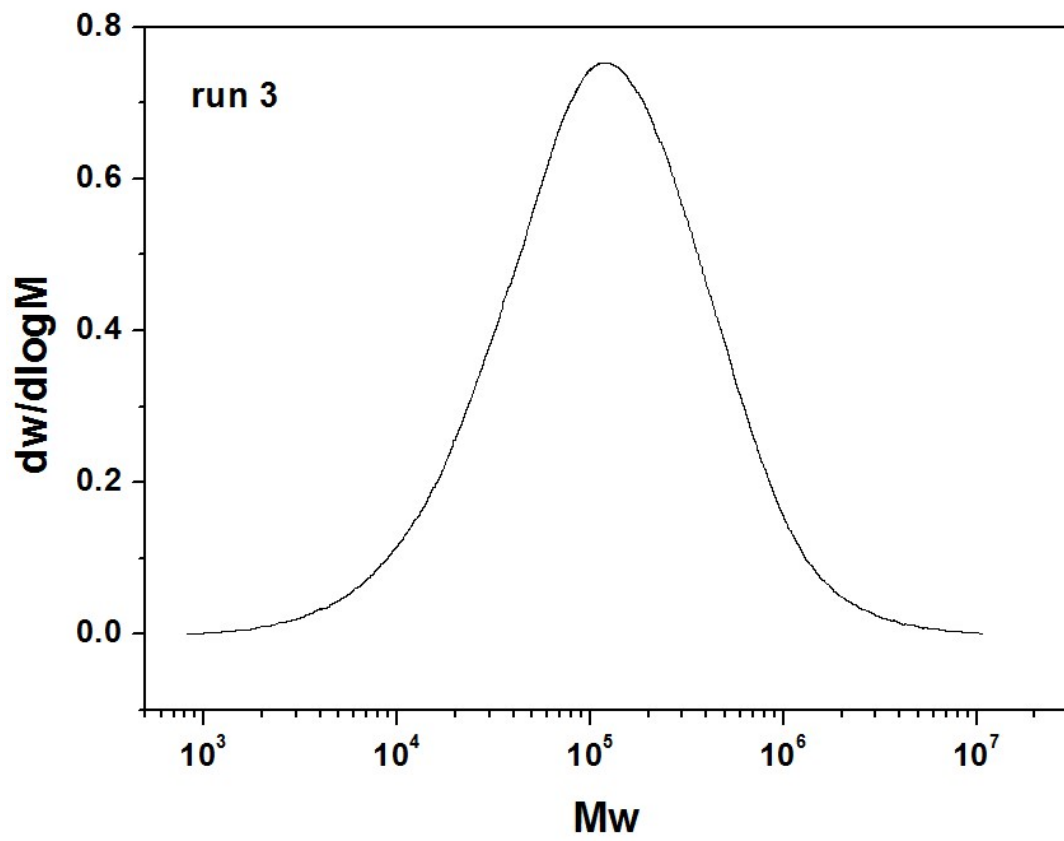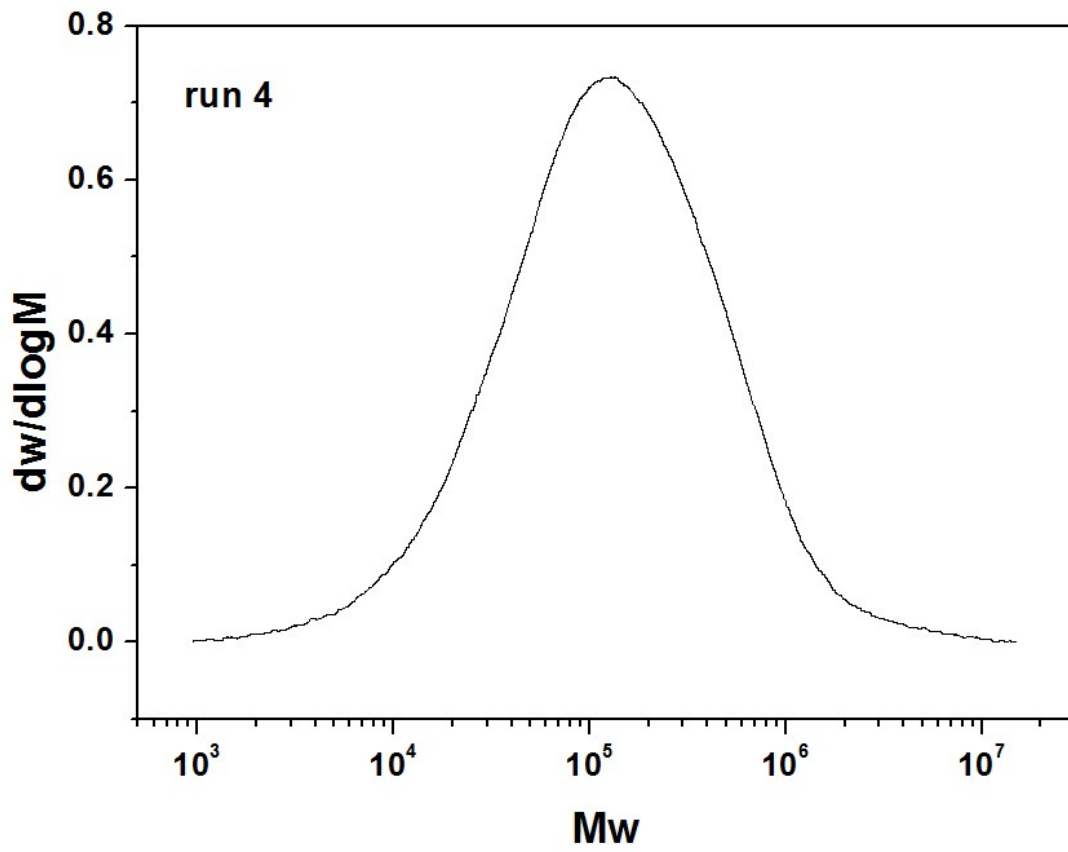

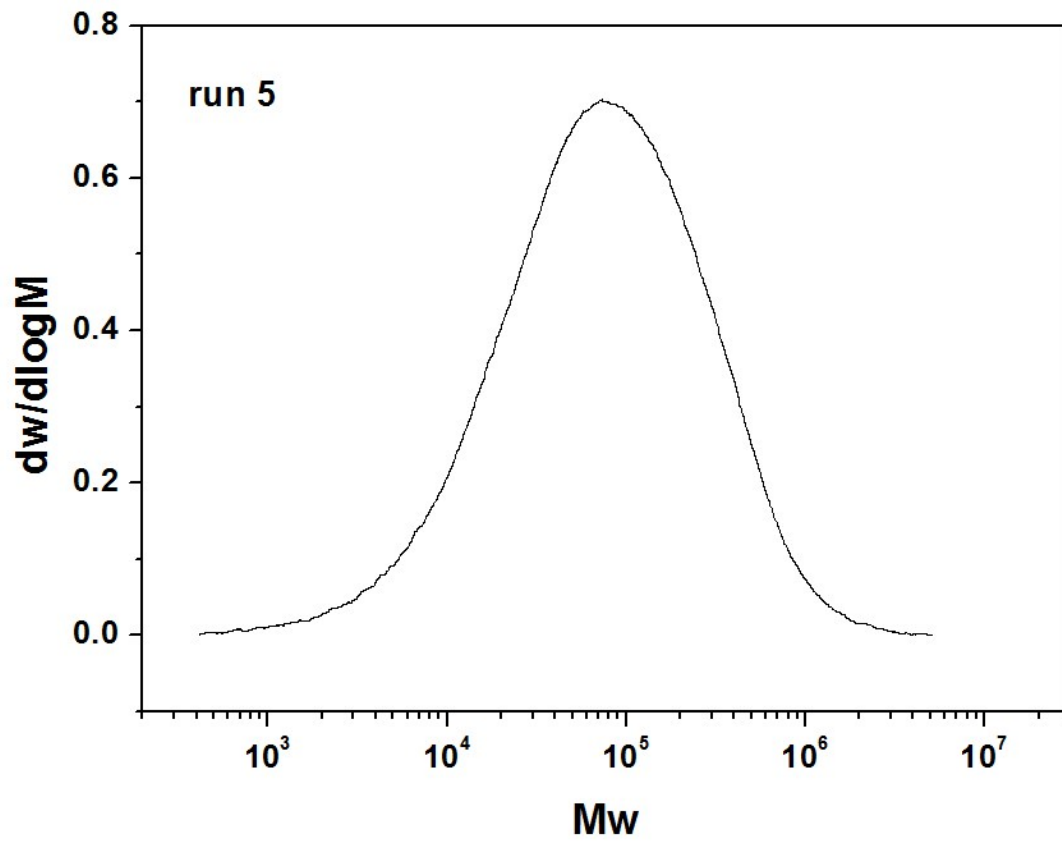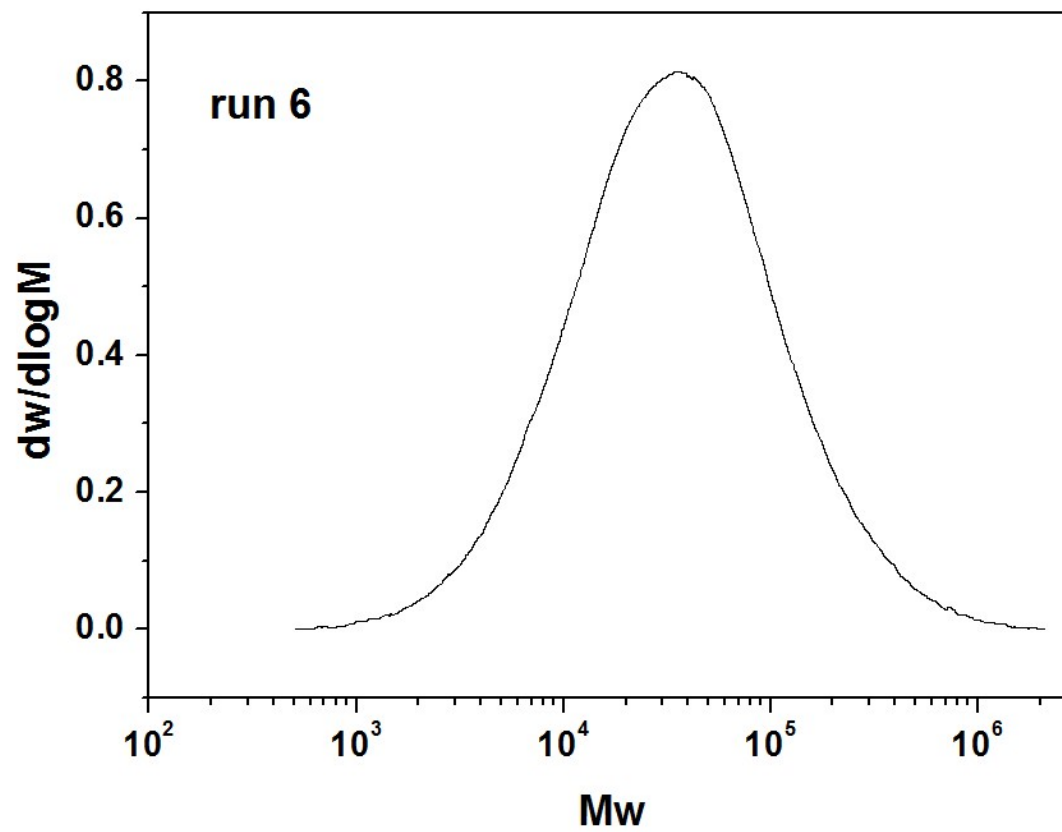

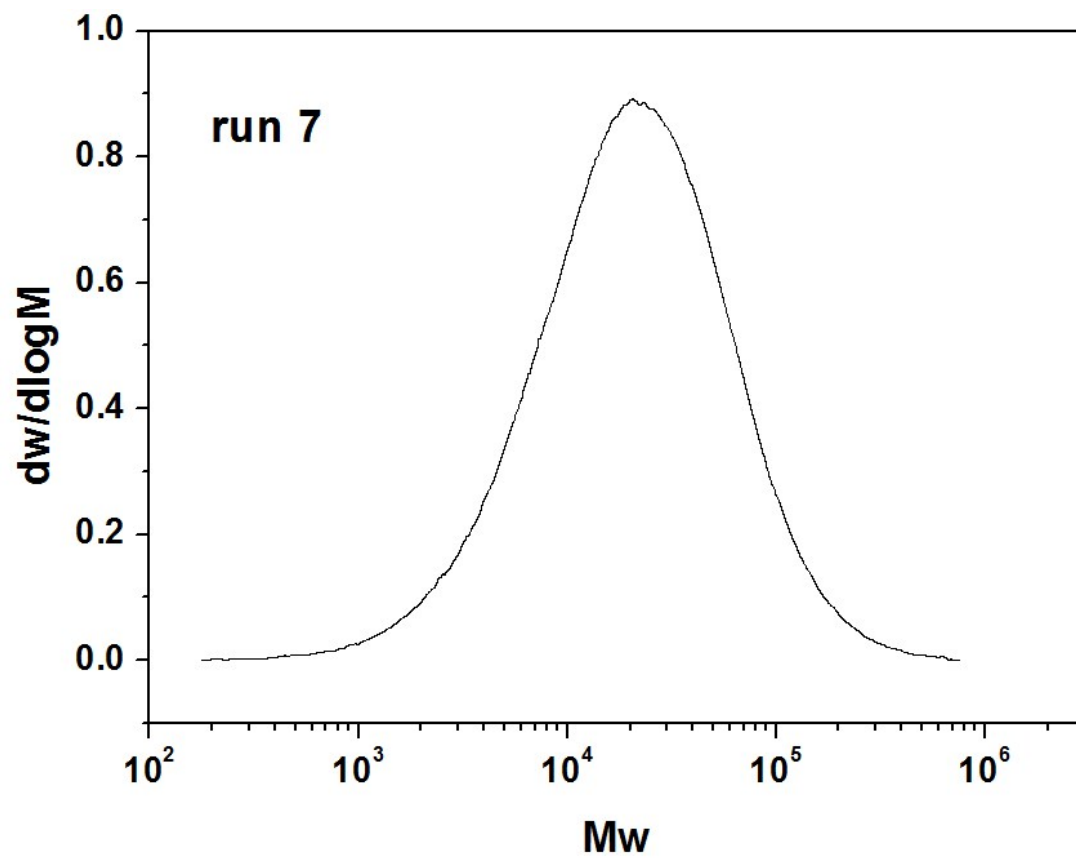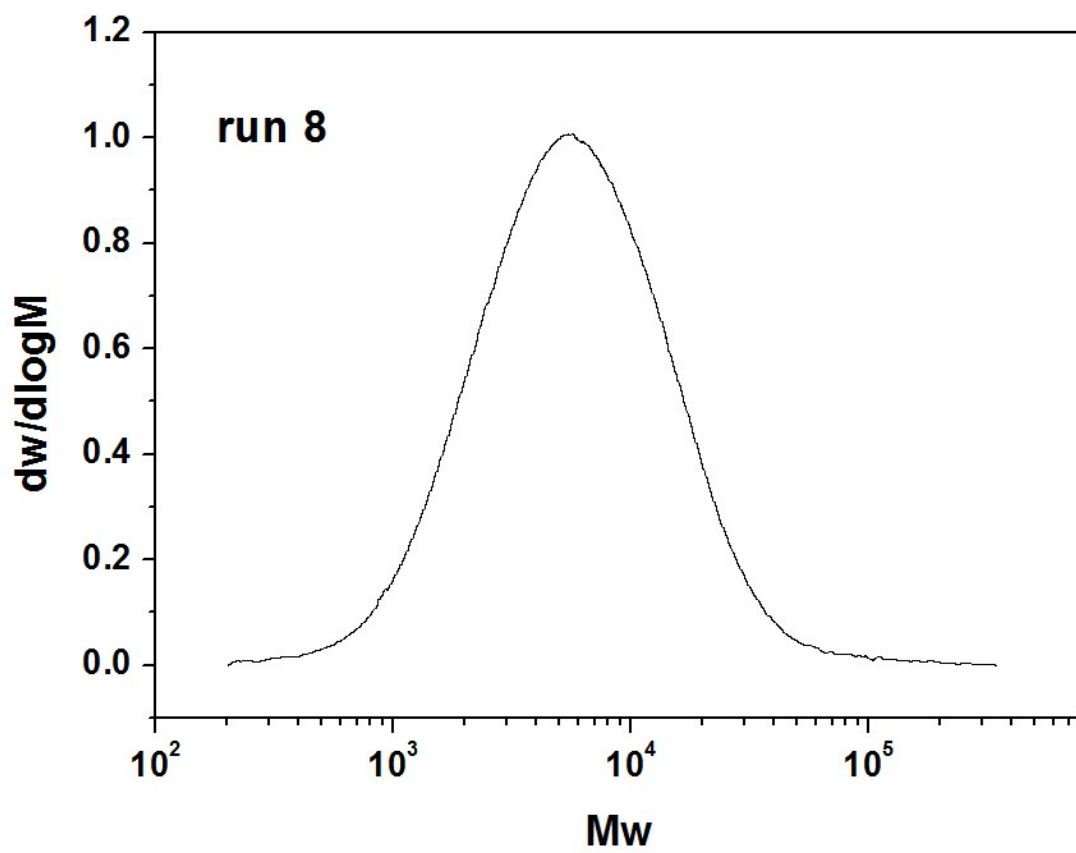

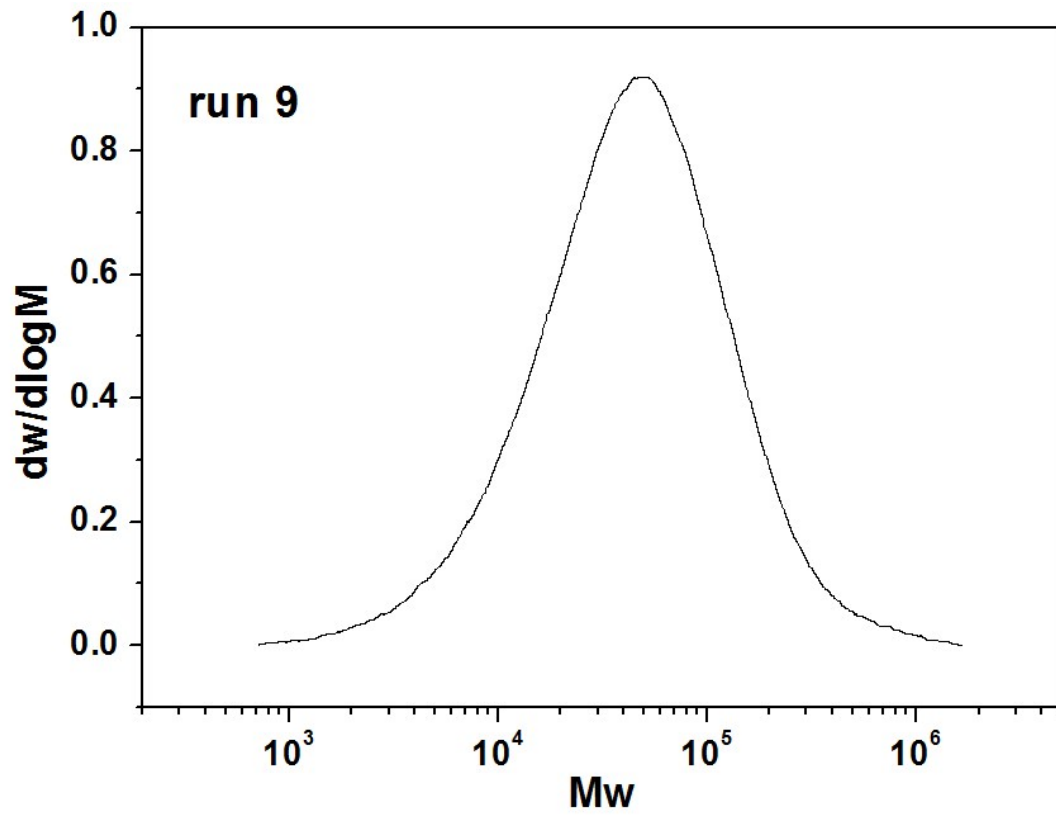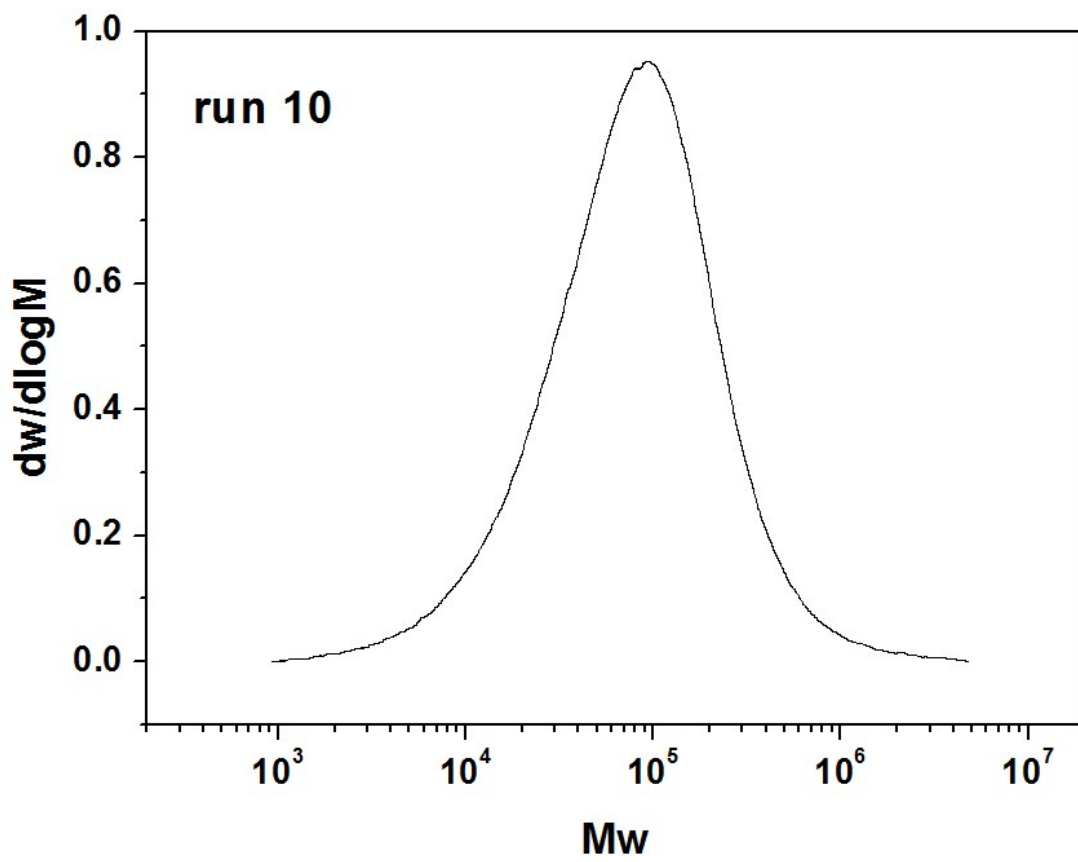

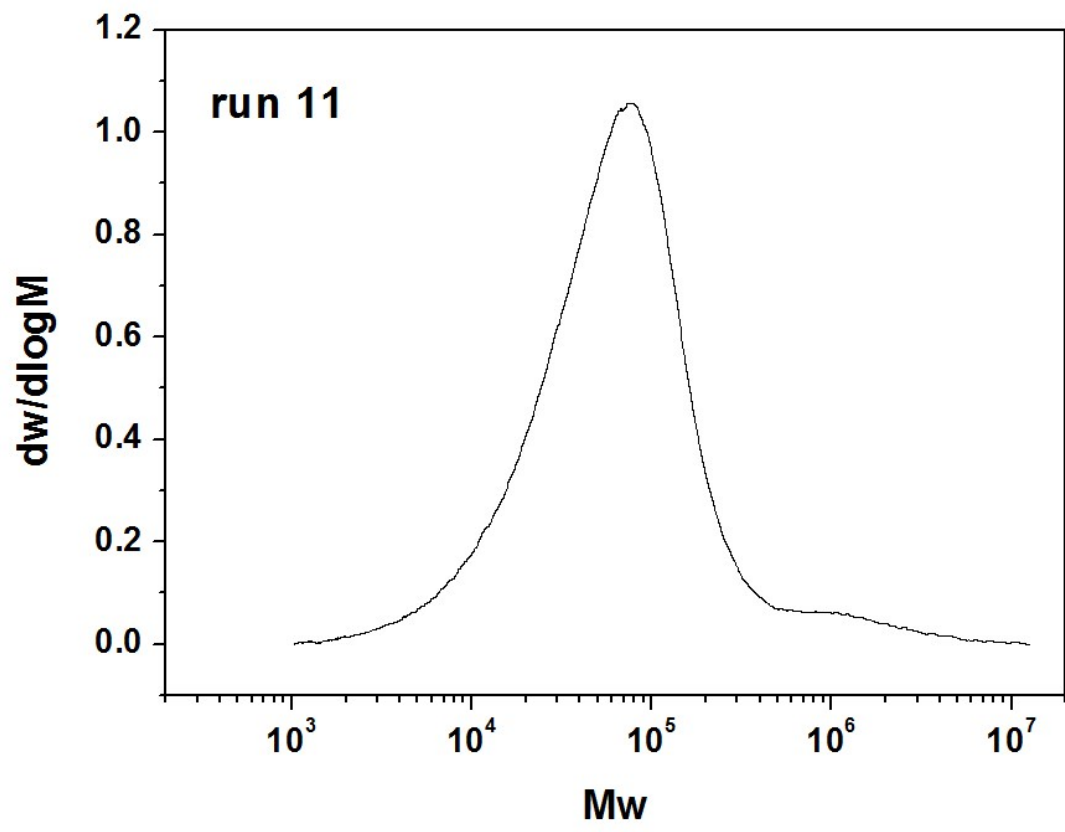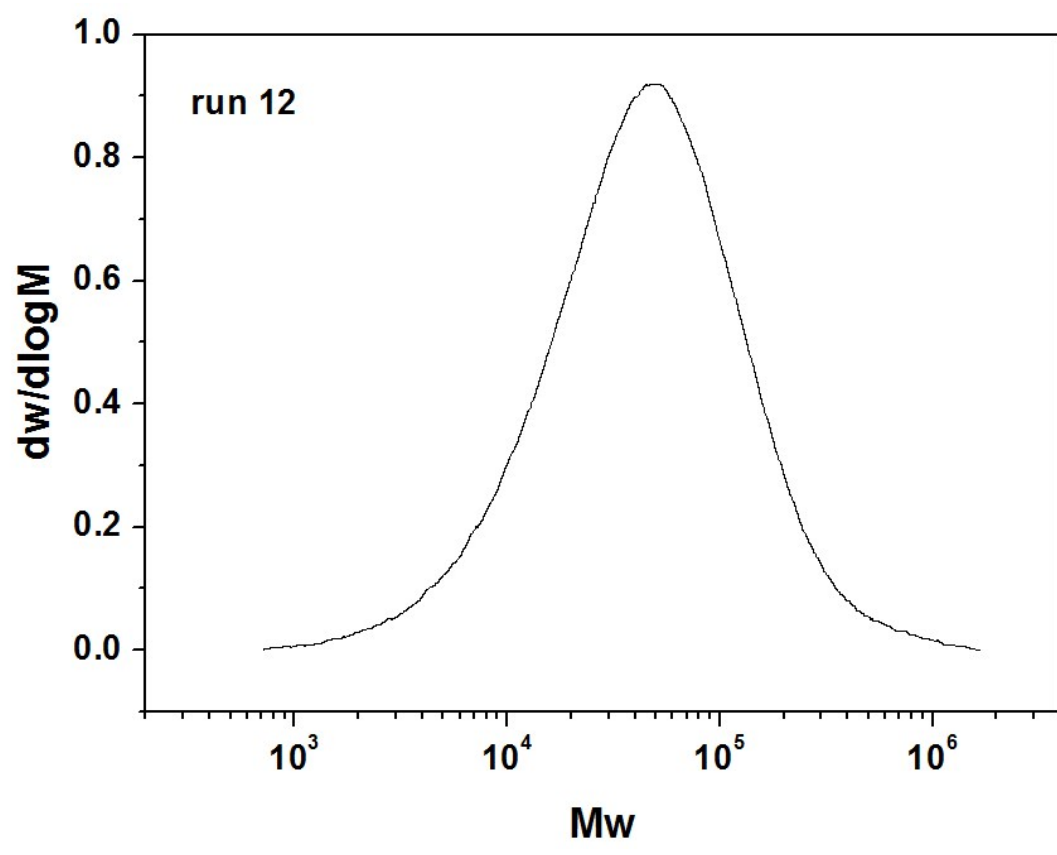

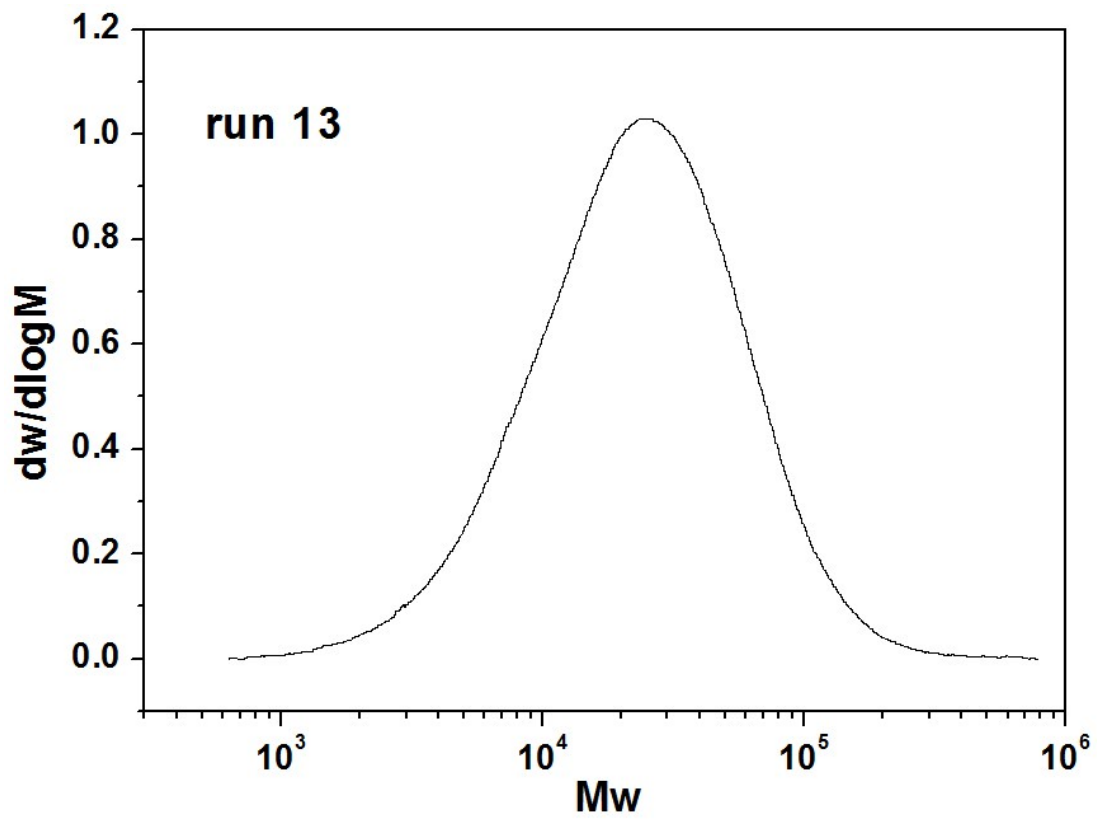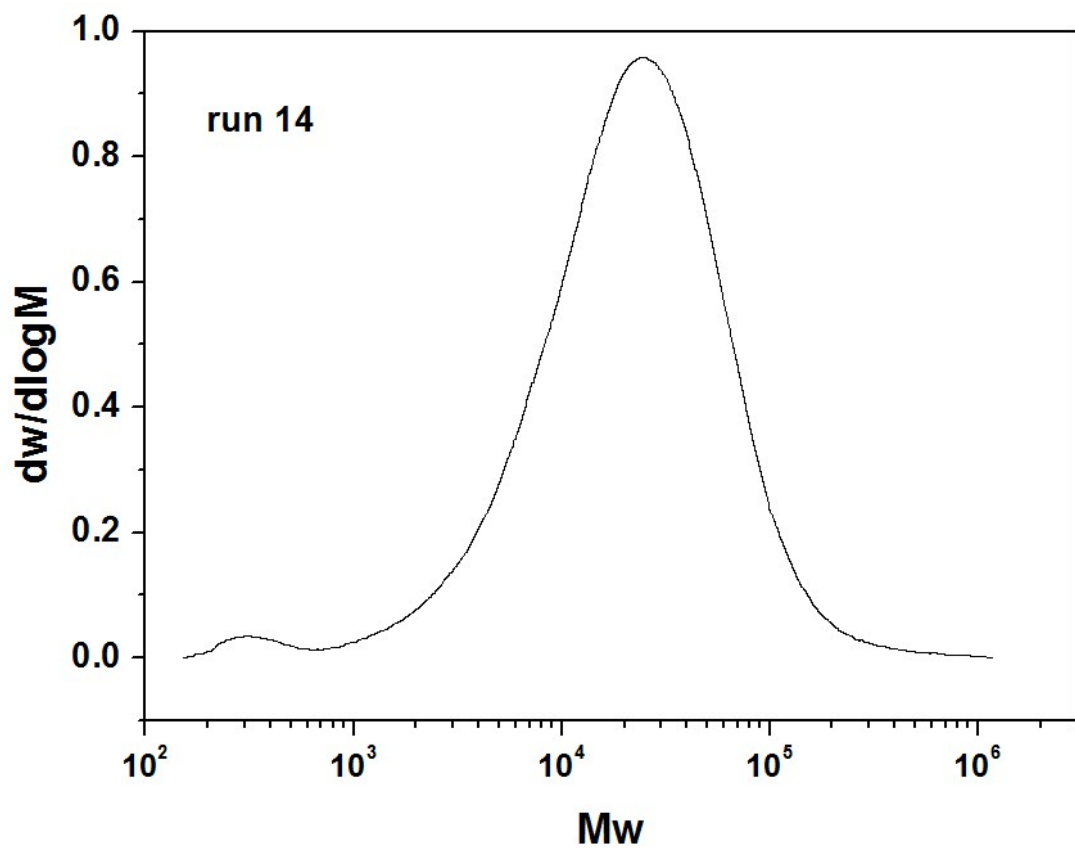



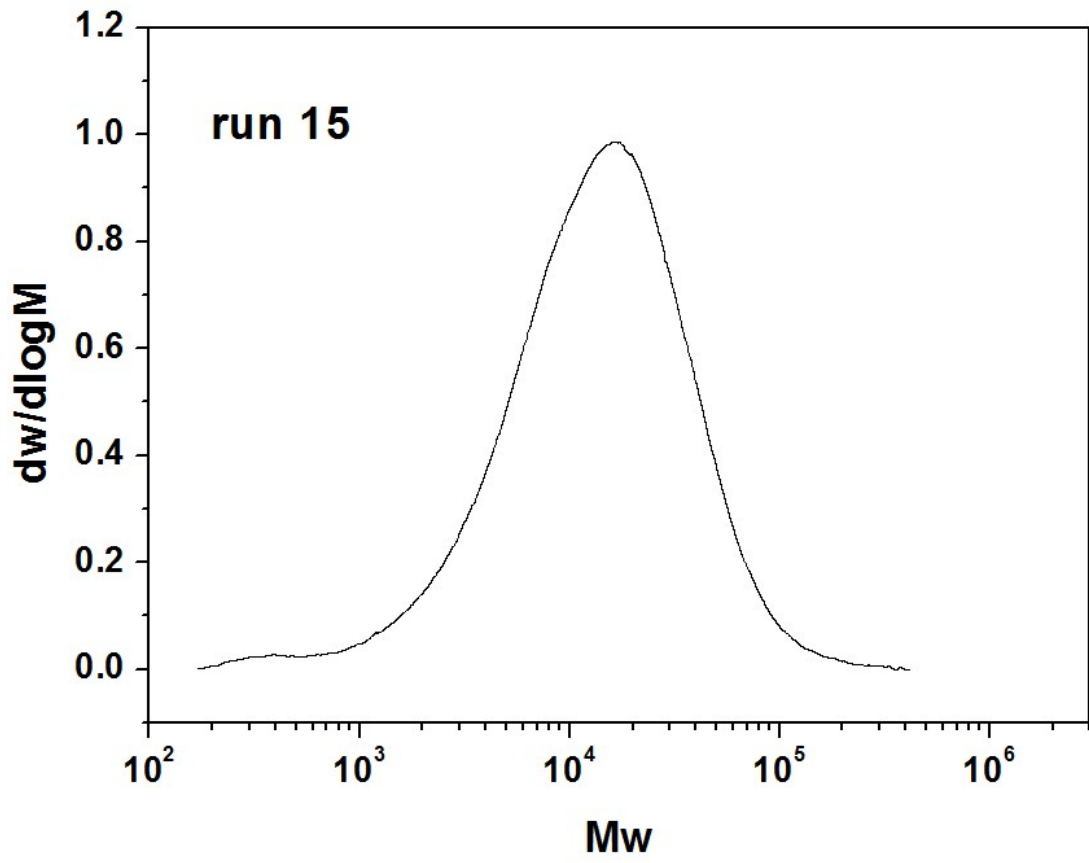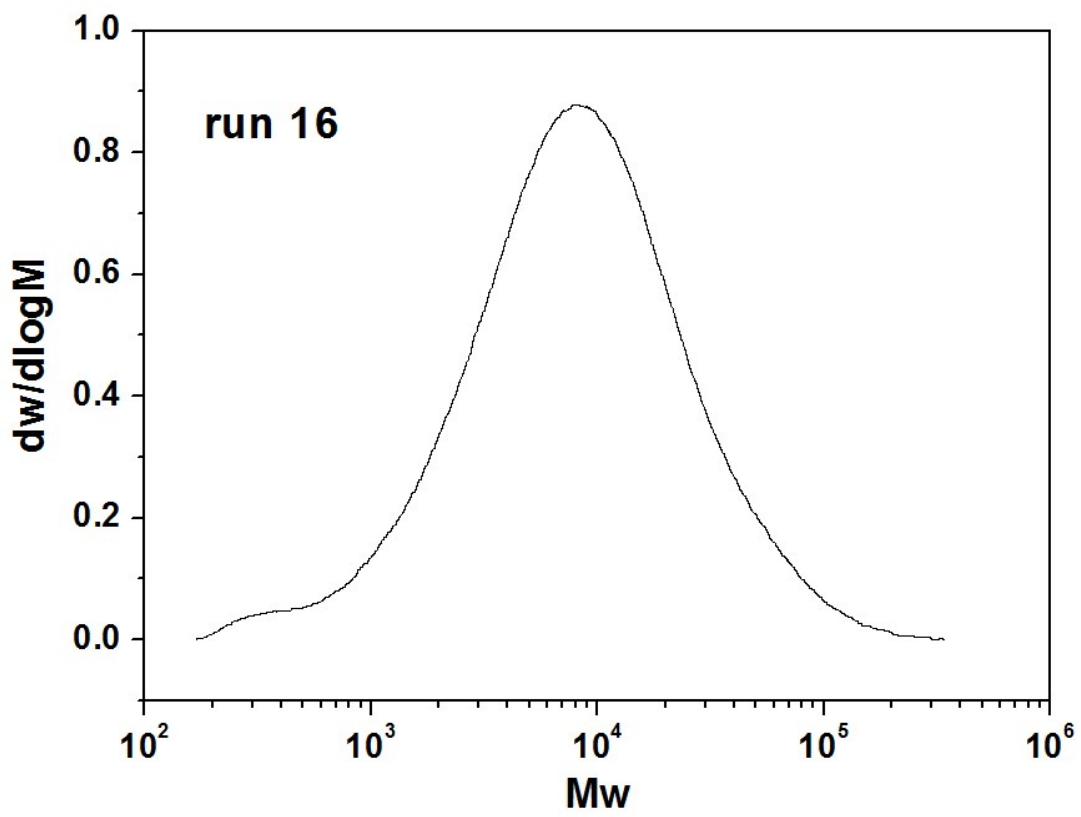

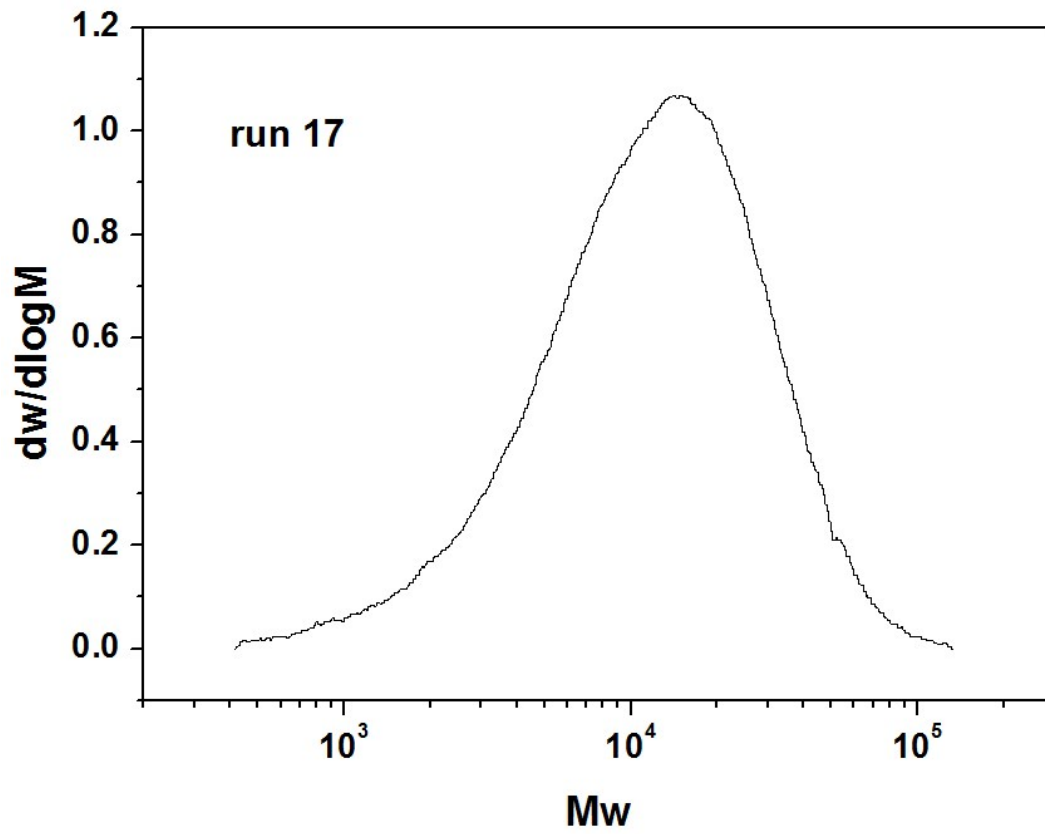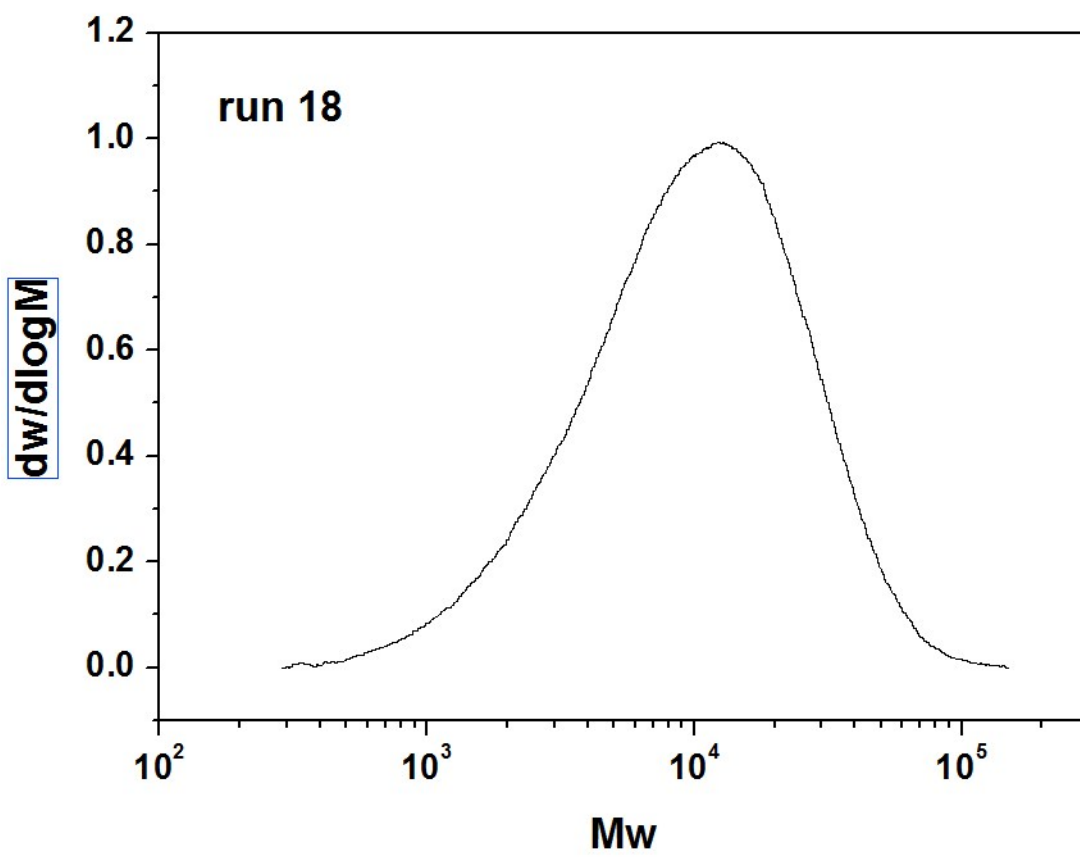

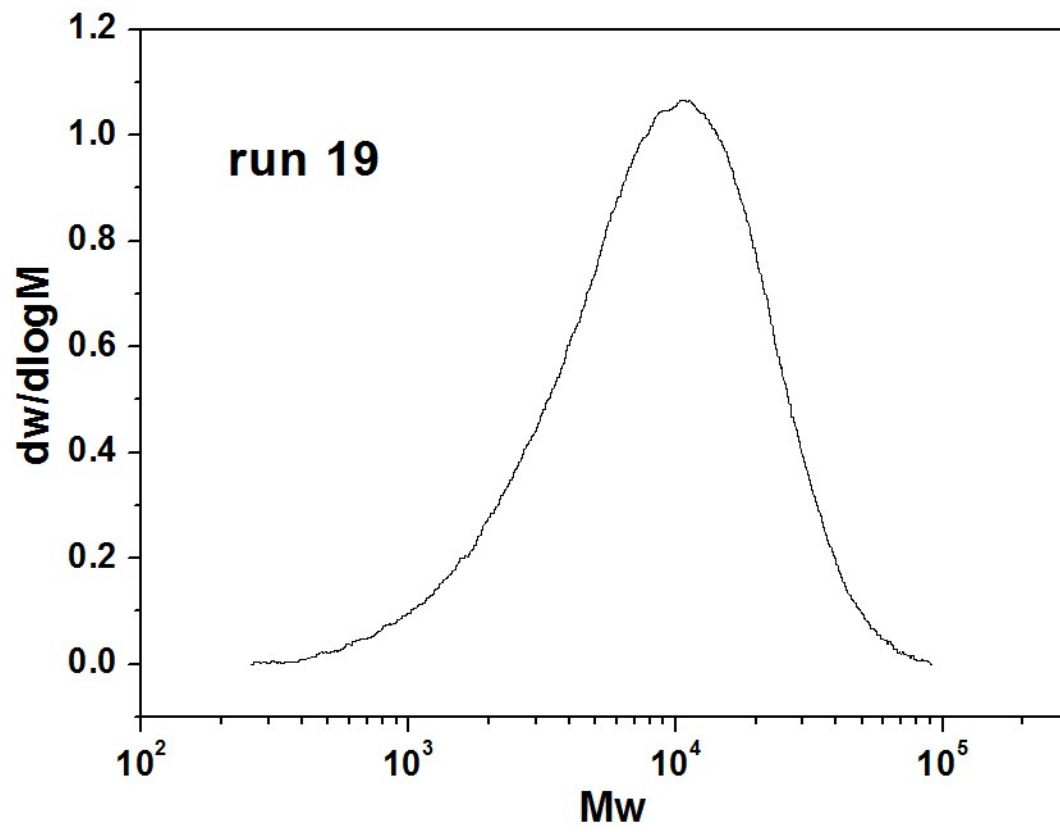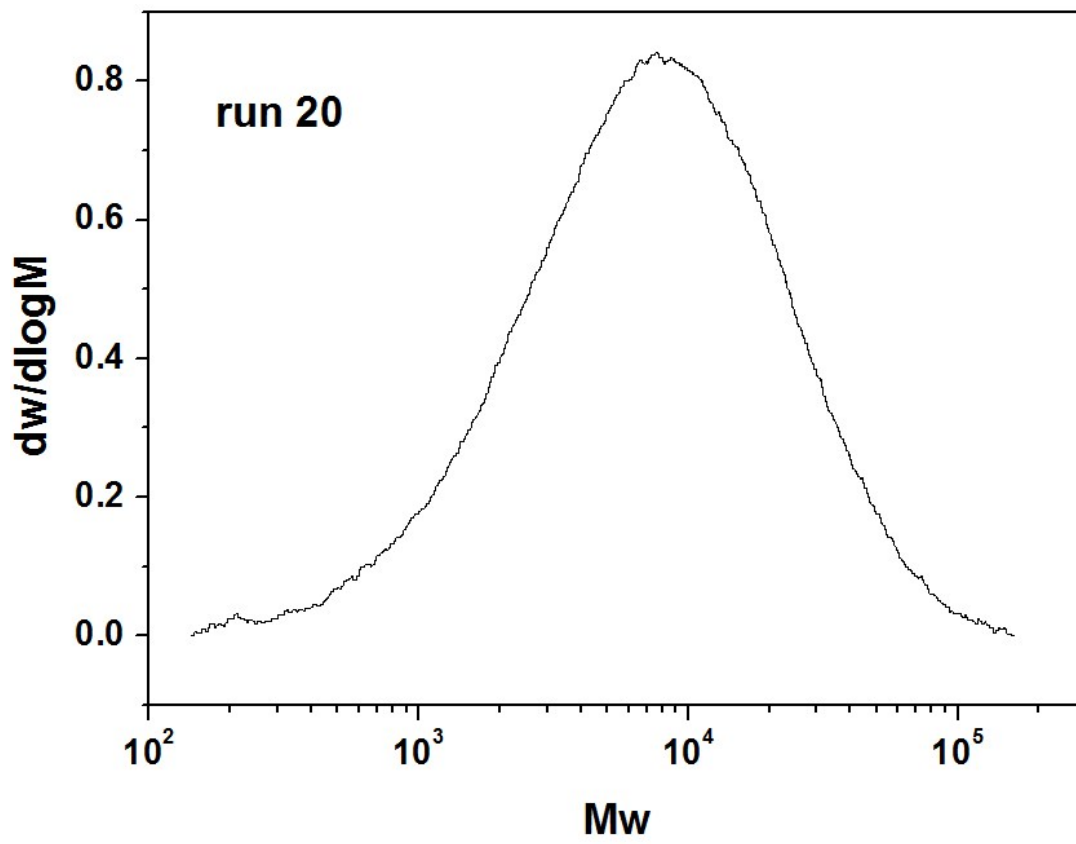

2.  $^{13}\text{C}$ -NMR spectra

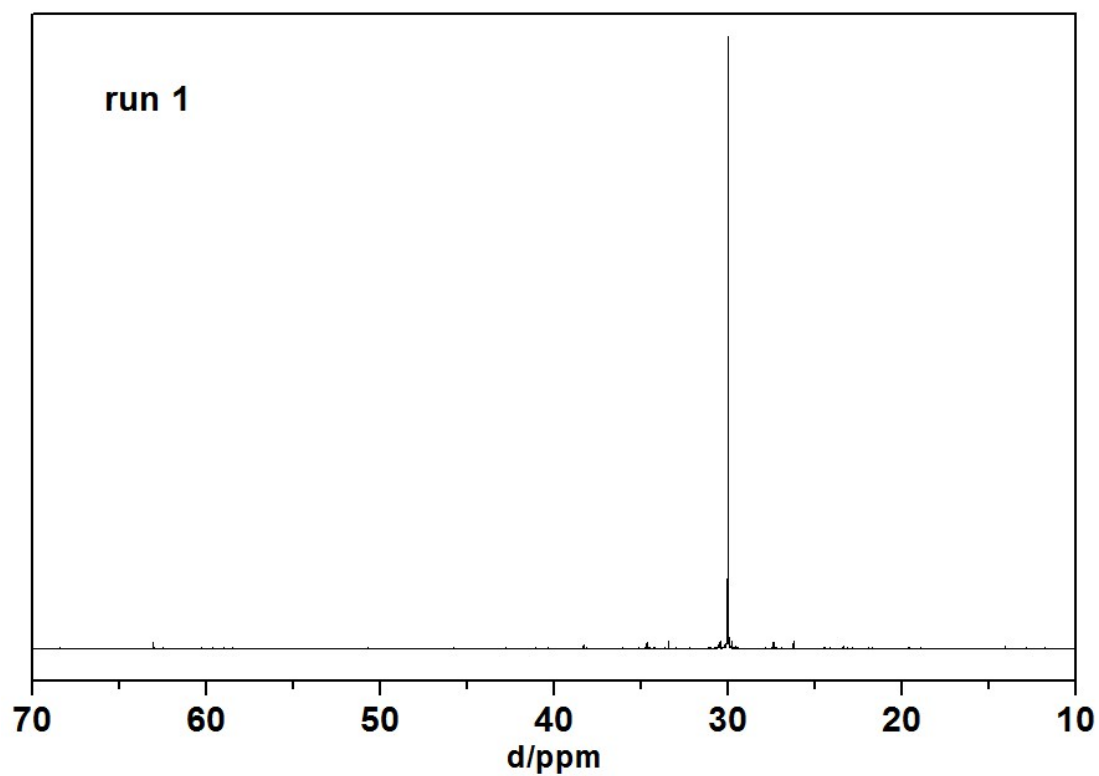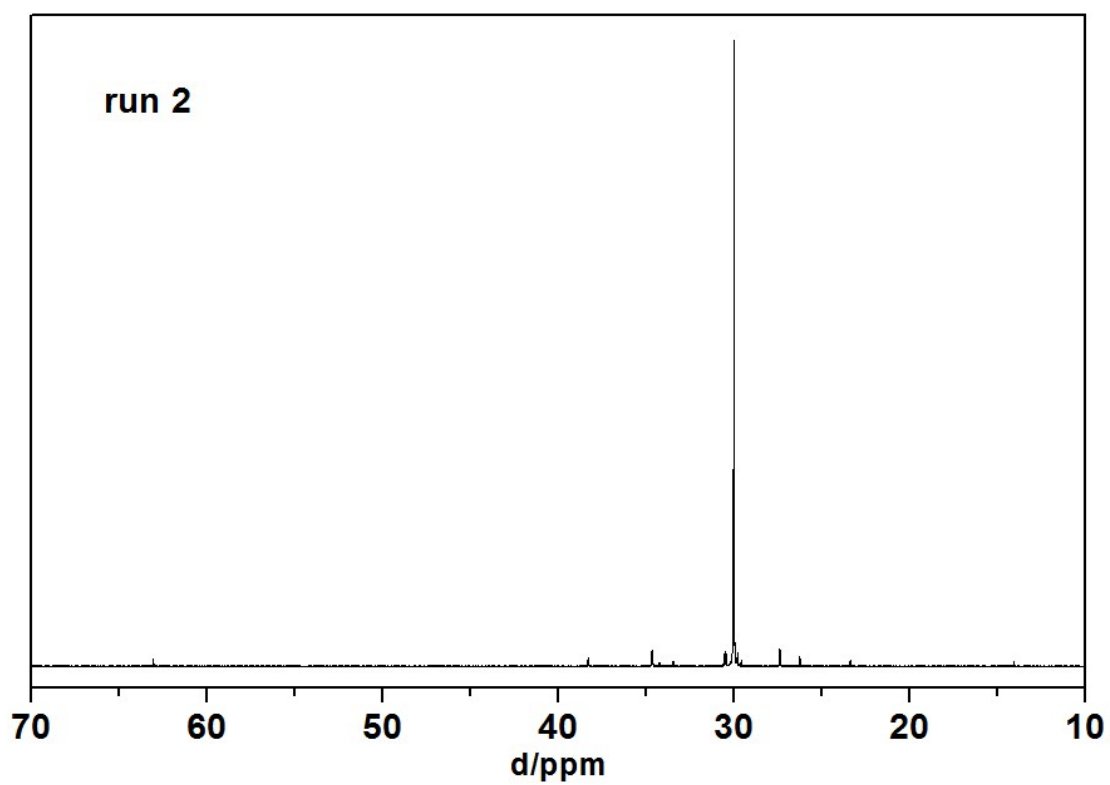

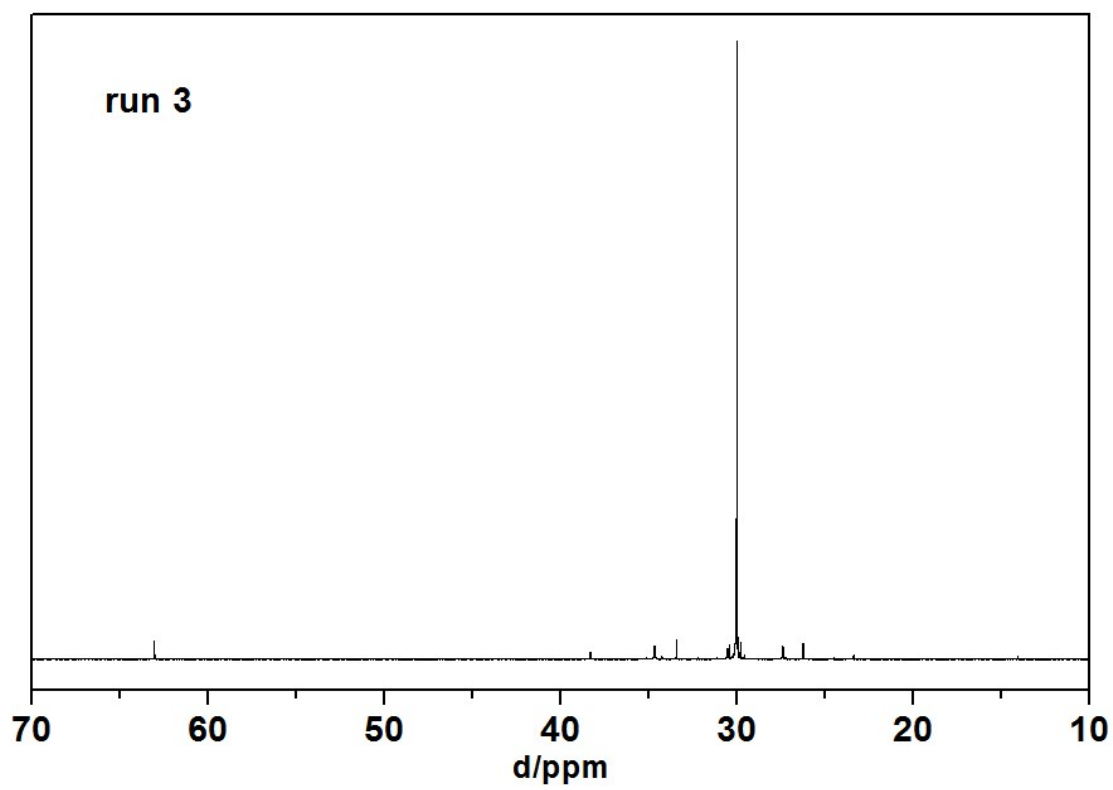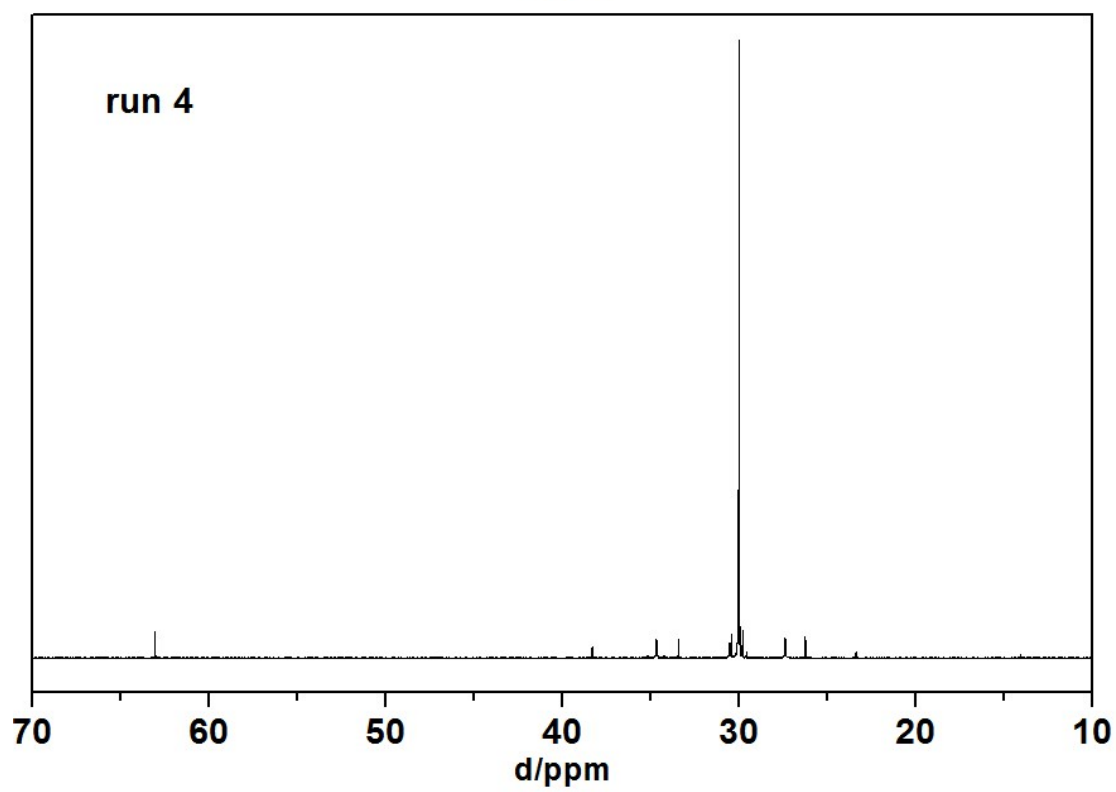

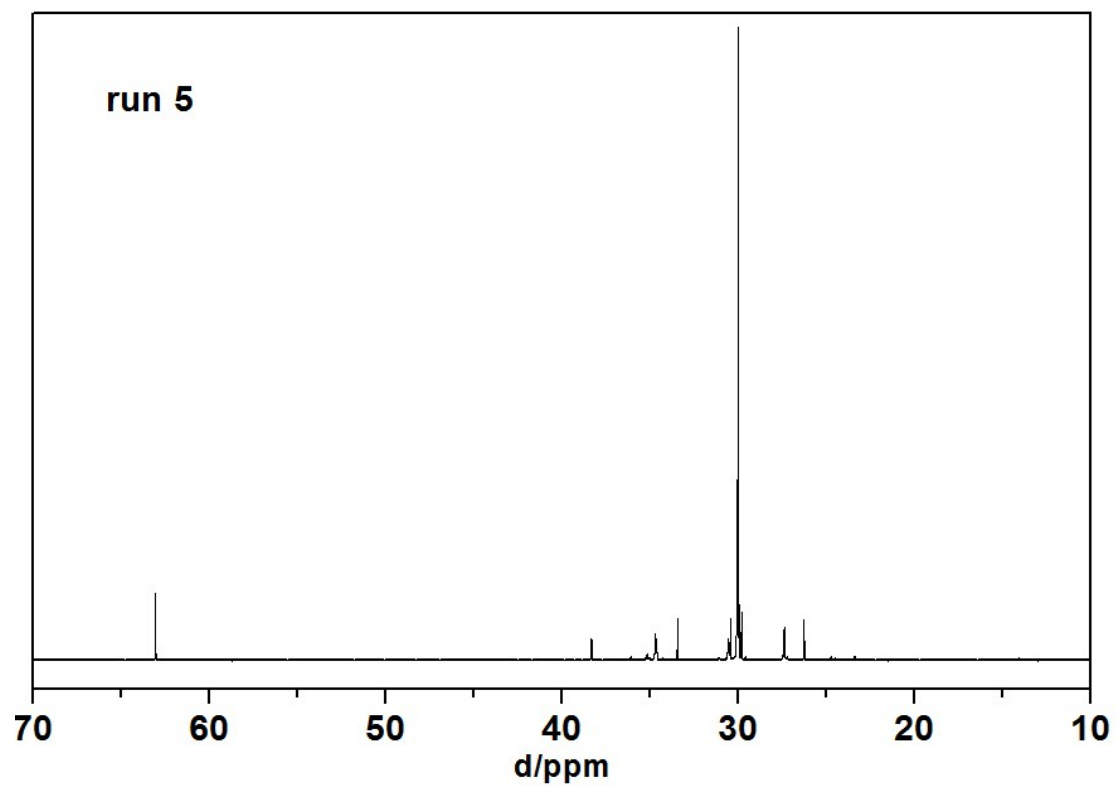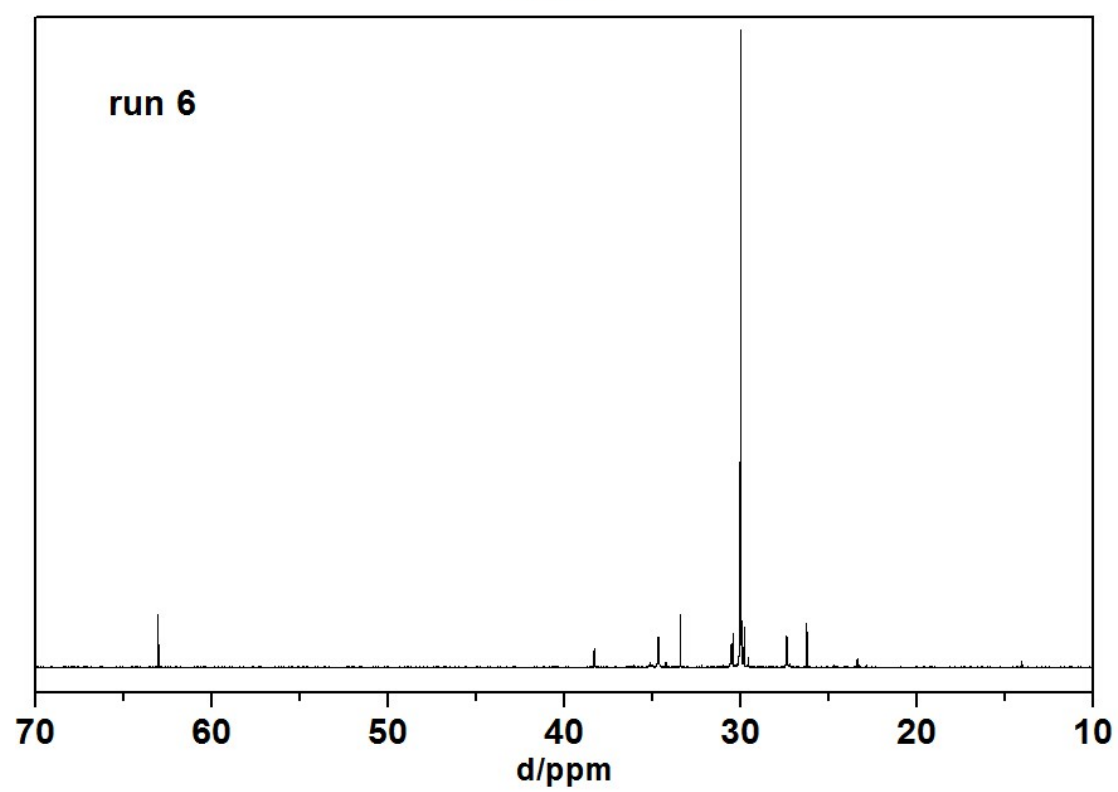

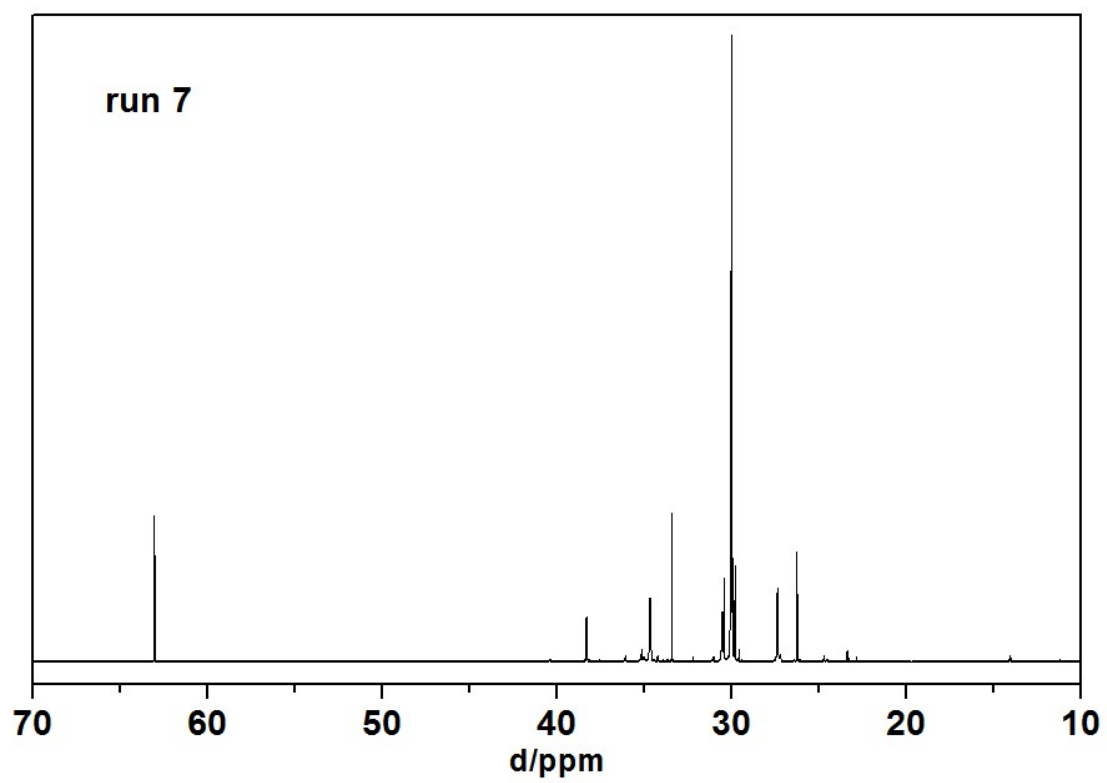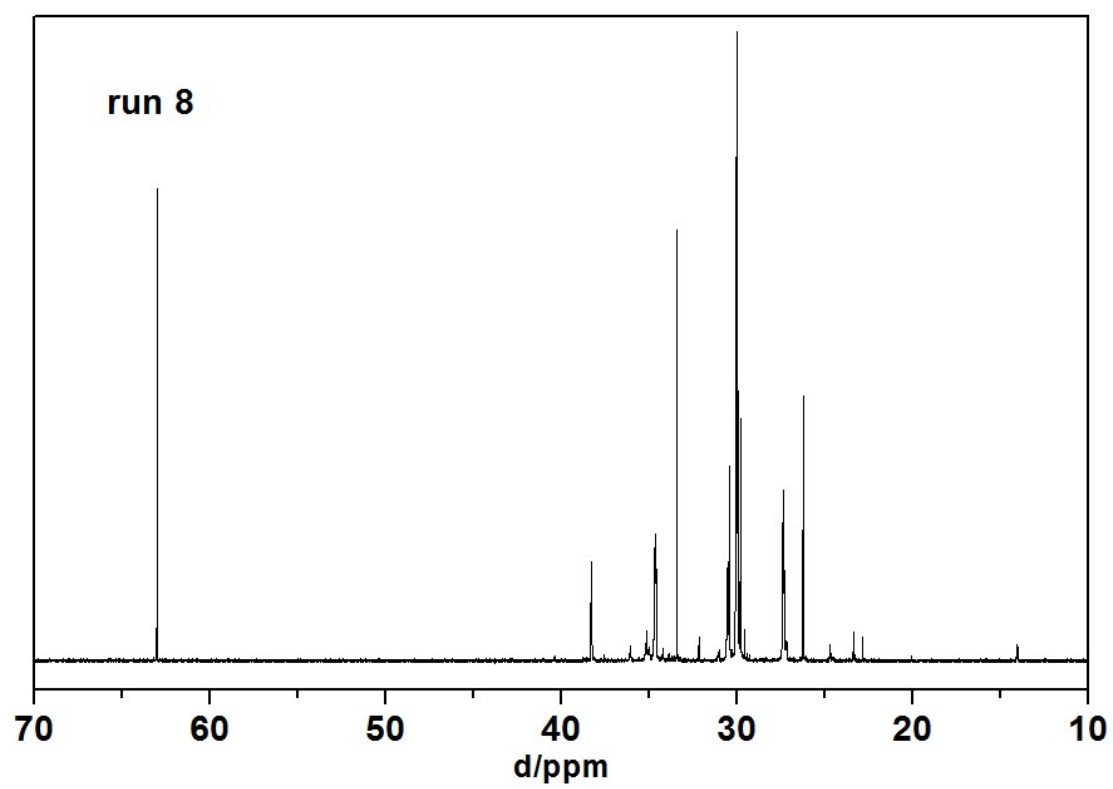

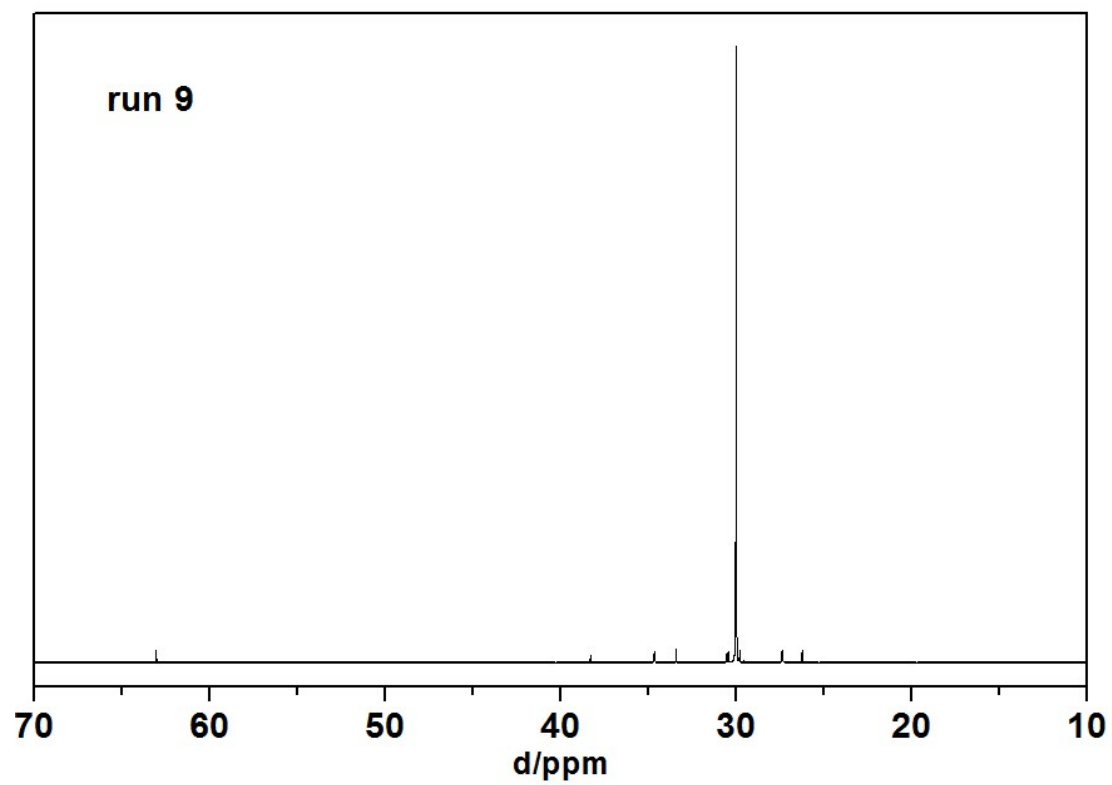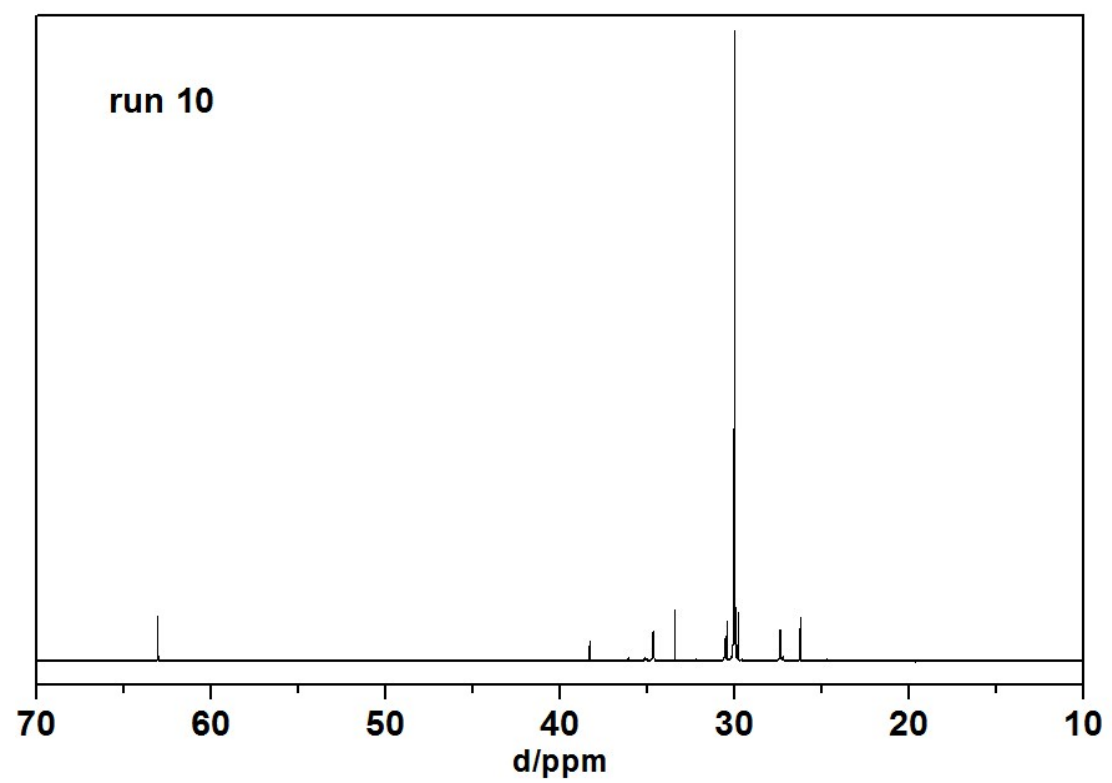



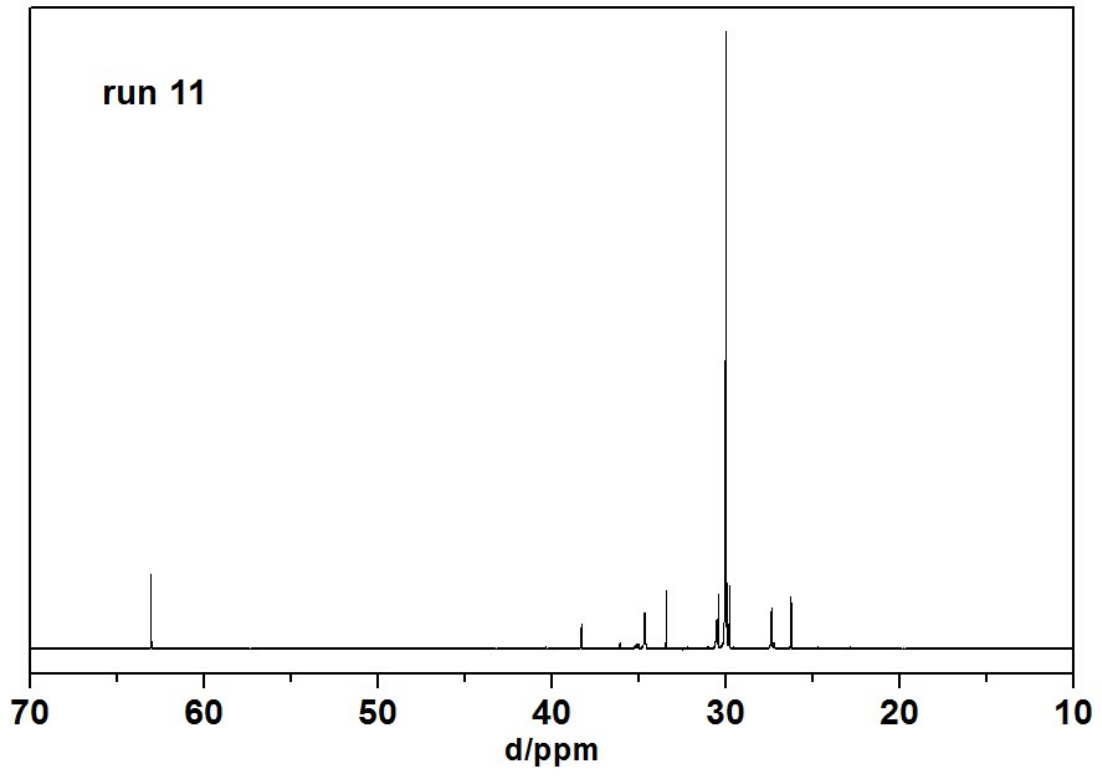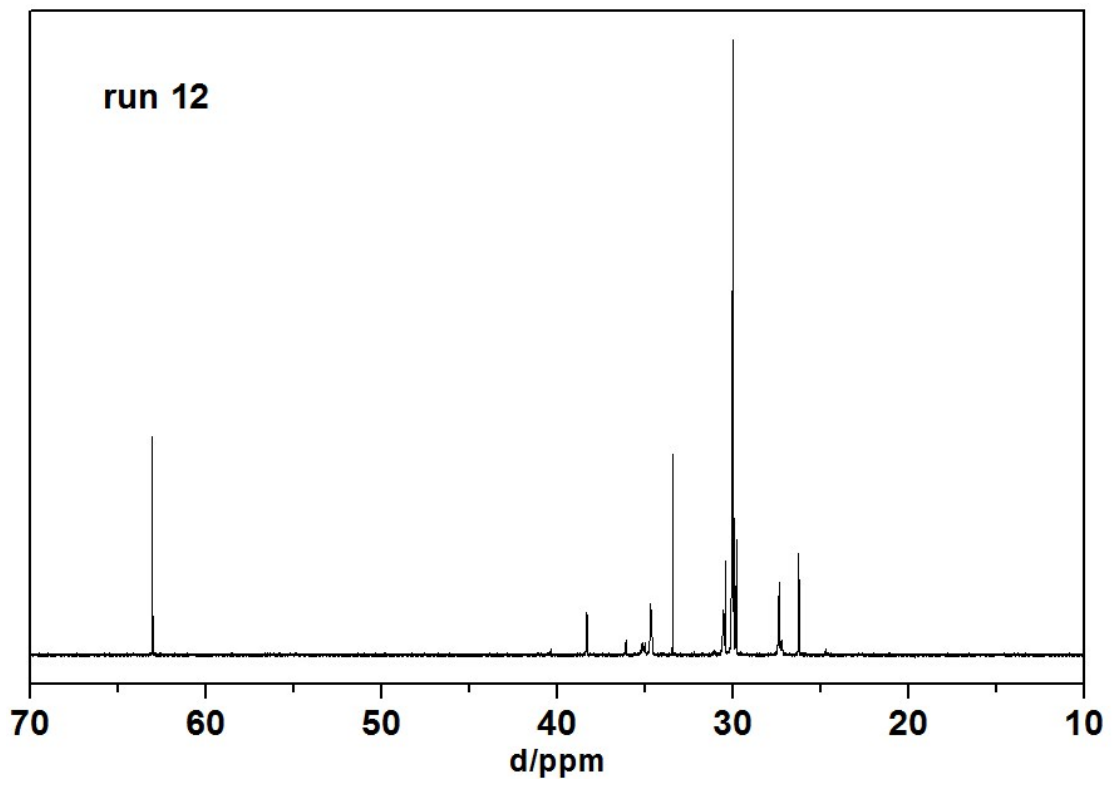

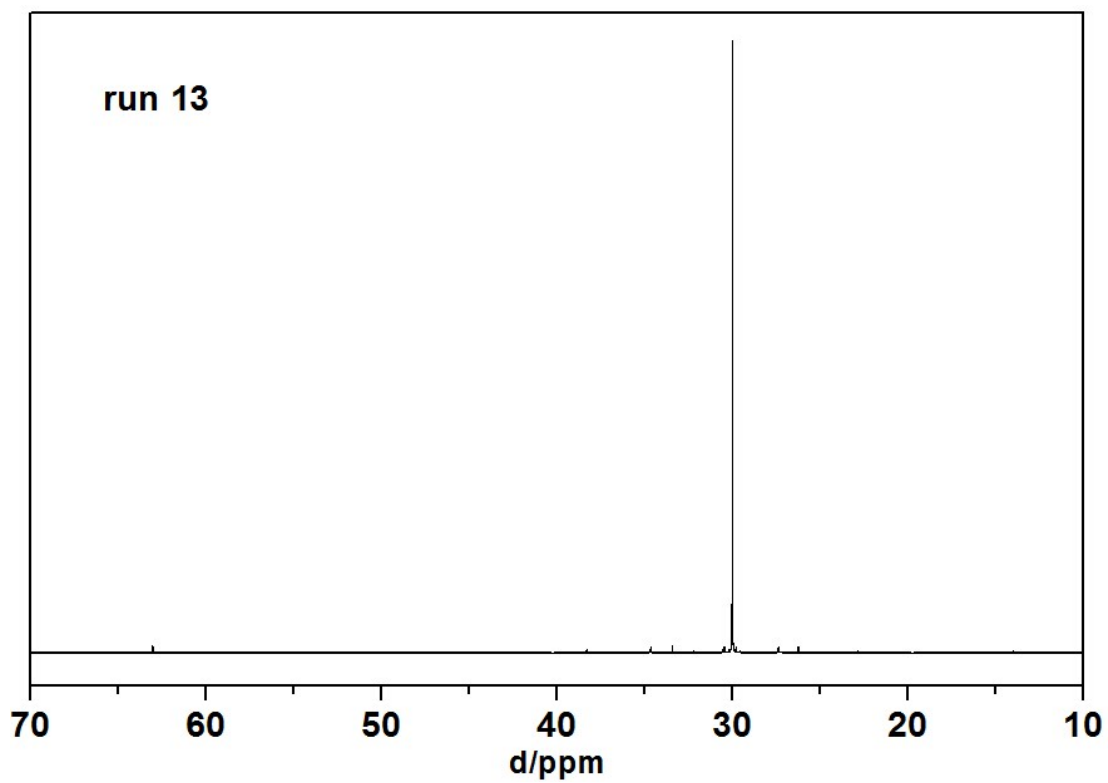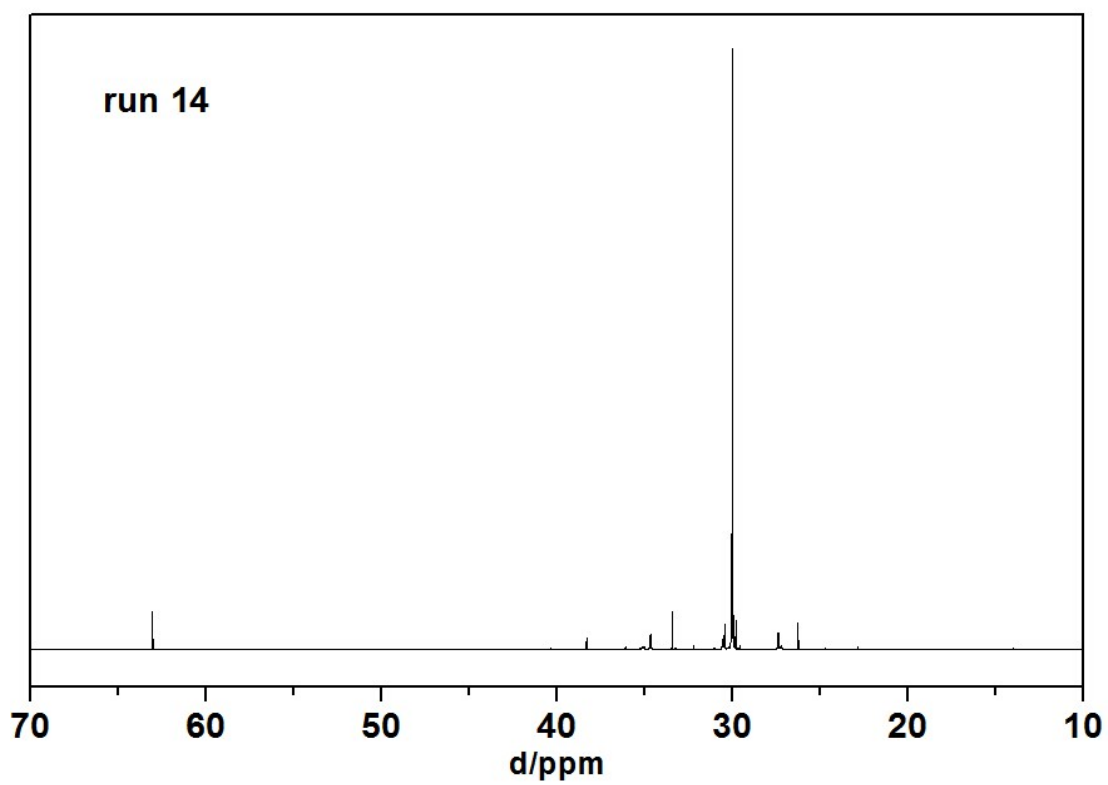

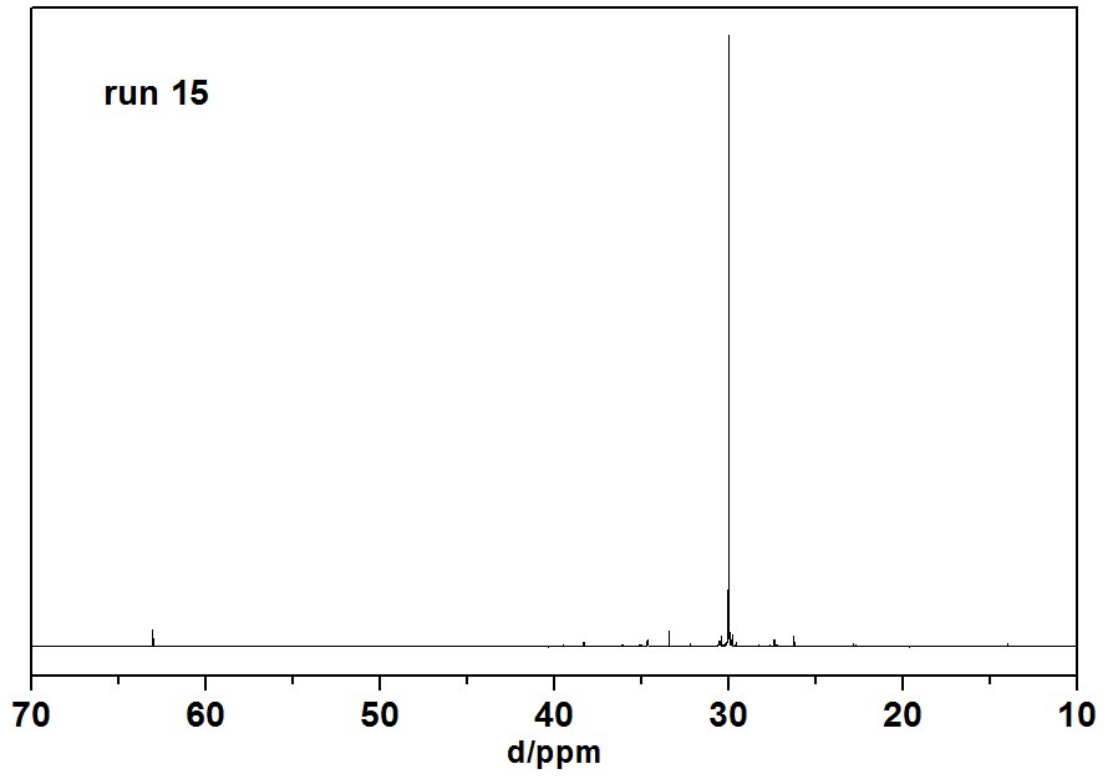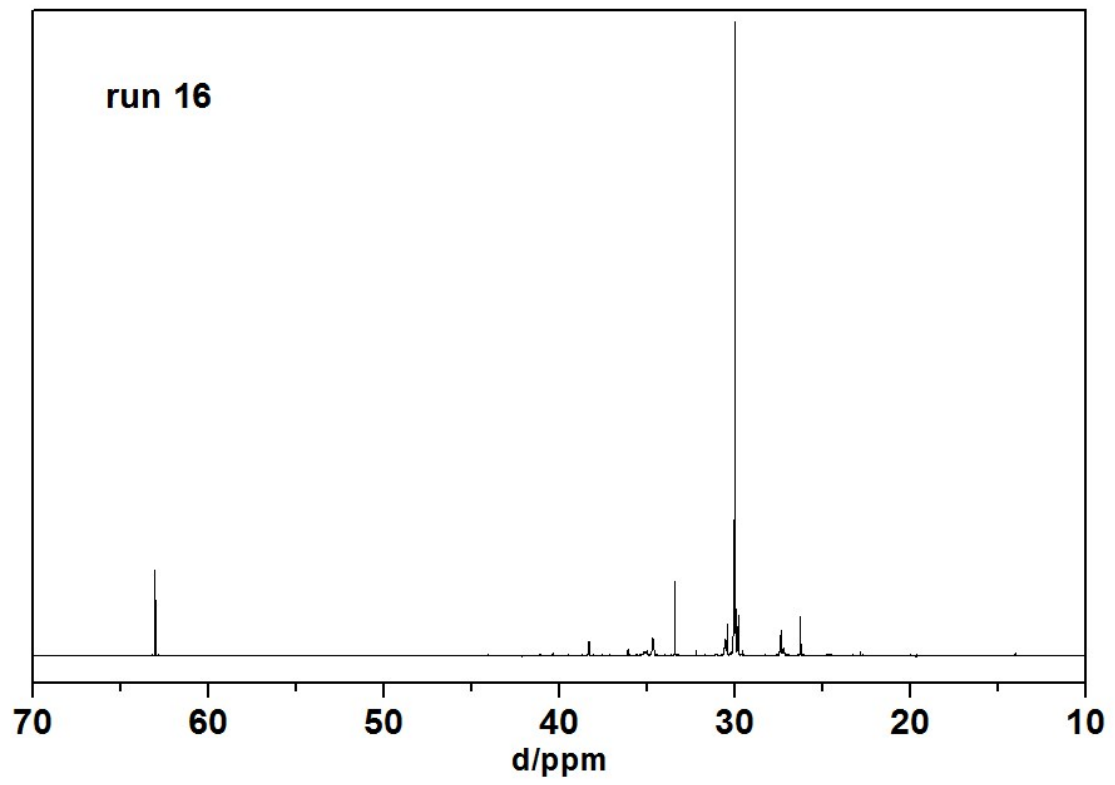

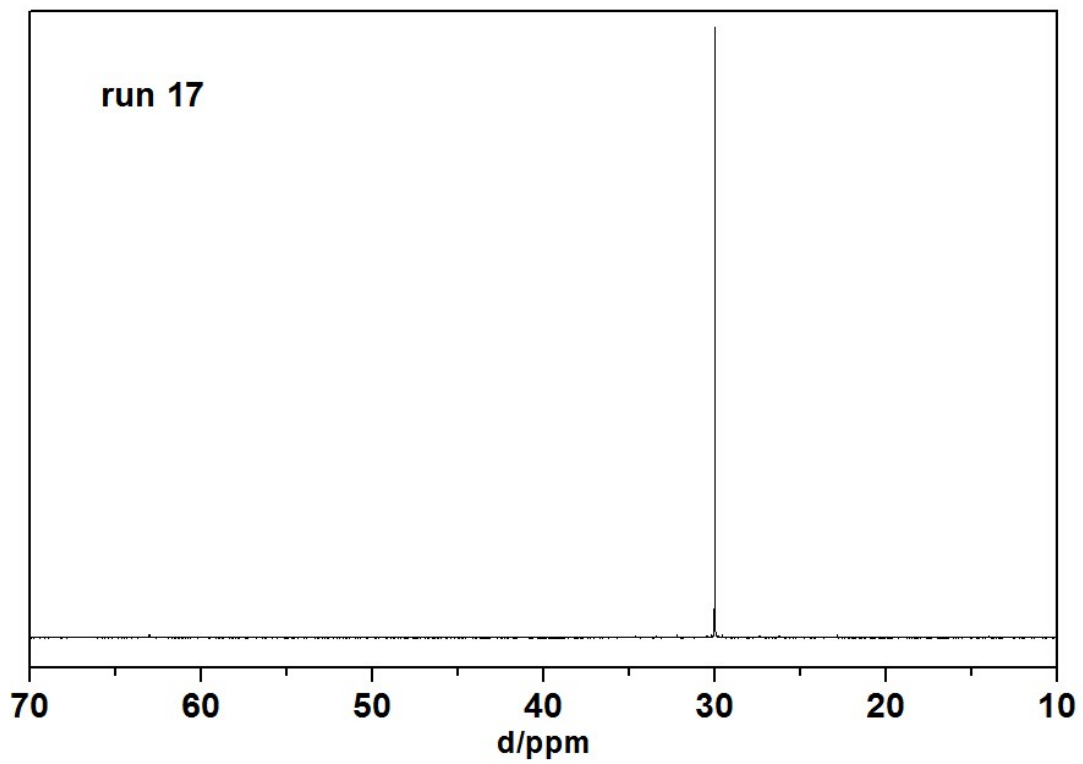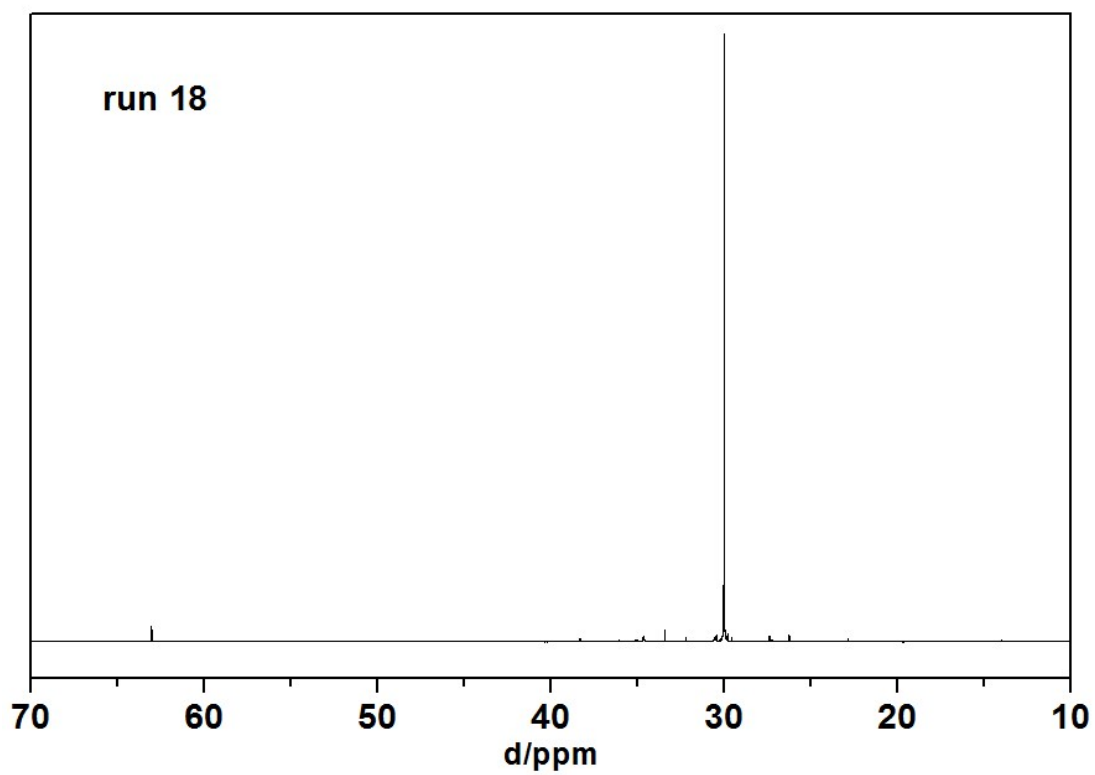

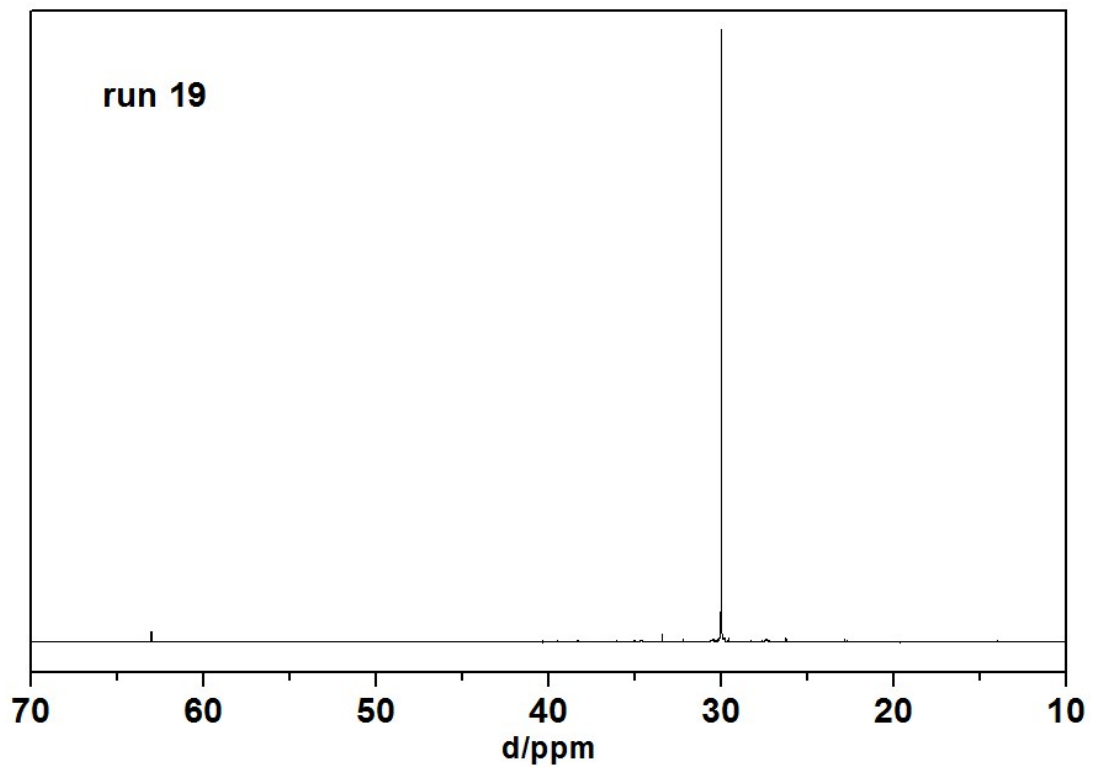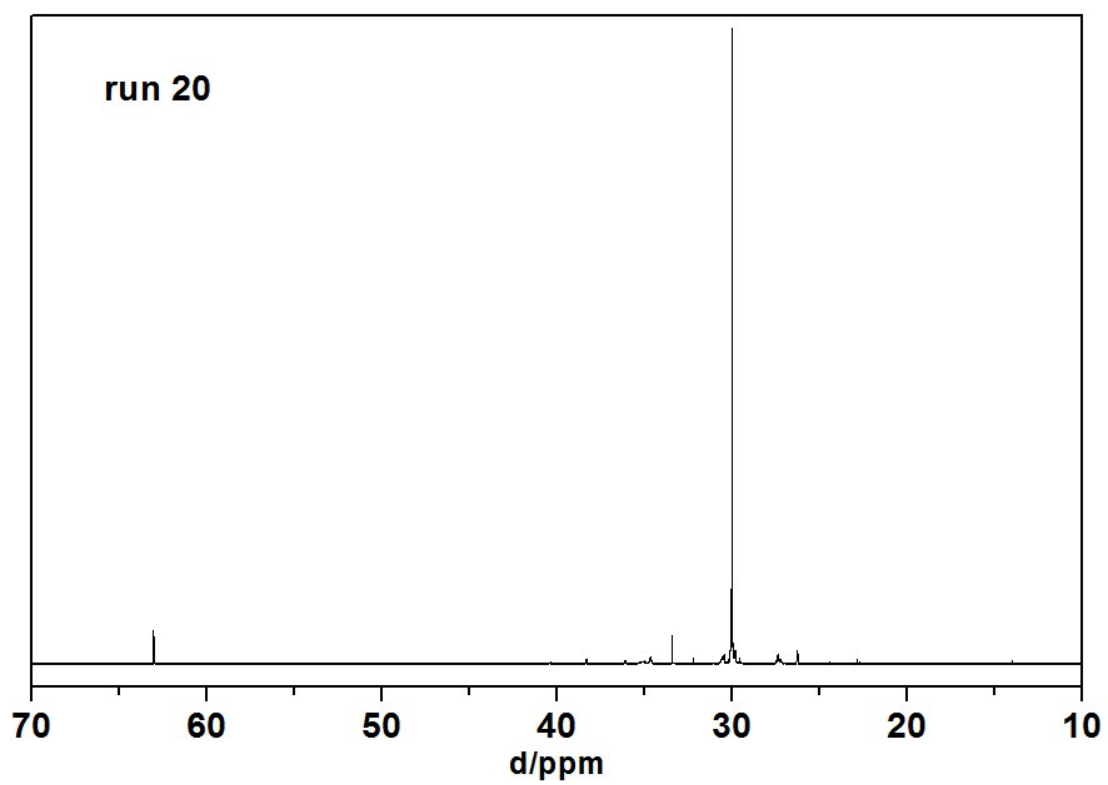

Supplement: c5ra20007e1.pdf [file c5ra20007e1.pdf]
